# Supplementary material for: Copper-catalyzed enantioselective conjugate reduction of α,β-unsaturated esters with chiral phenol–carbene ligands
Source: publisher site journal article supplement (doi:10.3762/bjoc.16.50), 2020-03-31

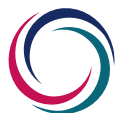

## Supporting Information

for

### **Copper-catalyzed enantioselective conjugate reduction of $\alpha,\beta$ -unsaturated esters with chiral phenol–carbene ligands**

Shohei Mimura, Sho Mizushima, Yohei Shimizu and Masaya Sawamura

*Beilstein J. Org. Chem.* **2020**, *16*, 537–543. doi:10.3762/bjoc.16.50

**Experimental procedures, characterization data, HPLC charts, and NMR spectra ( $^1\text{H}$ ,  $^{13}\text{C}$ ) for the new compounds**

## Table of Contents

|                                                                         |         |
|-------------------------------------------------------------------------|---------|
| Instrumentation and Chemicals                                           | S1      |
| Solvent Screening                                                       | S2      |
| Preparation of $\alpha,\beta$ -Unsaturated Esters                       | S3–S6   |
| Characterization Data for $\alpha,\beta$ -Unsaturated Esters            | S6–S8   |
| Procedure for the Copper-catalyzed Enantioselective Conjugate Reduction | S8      |
| Characterization Data for Reduction Products                            | S8–S12  |
| References                                                              | S13     |
| HPLC Charts                                                             | S14–S23 |
| NMR Spectra                                                             | S24–S37 |

## Instrumentation and Chemicals

NMR spectra were recorded on a JEOL ECA-400, operating at 400 MHz for  $^1\text{H}$  NMR and 100.5 MHz for  $^{13}\text{C}$  NMR. Chemical shift values for  $^1\text{H}$  and  $^{13}\text{C}$  are referenced to  $\text{Me}_4\text{Si}$  and the residual solvent resonances, respectively. Mass spectra were obtained with Thermo Fisher Scientific Exactive, JEOL JMS-T100GCV at the Instrumental Analysis Division, Global Facility Center, Creative Research Institution, Hokkaido University. Chemical shifts are reported in  $\delta$  ppm. HPLC analyses were conducted on a HITACHI ELITE LaChrom system with a HITACHI L-2455 diode array detector or a Shimadzu HPLC systems (system controller: CBM-20A, pump: LC-20AR; detector: SPD-20A). TLC analyses were performed on commercial glass plates bearing a 0.25 mm layer of Merck silica gel 60 F<sub>254</sub>. Silica gel (Kanto Chemical Co., Silica gel 60 N, spherical, neutral) was used for column chromatography.

All reactions were carried out under nitrogen or argon atmosphere. Materials were obtained from commercial suppliers or prepared according to standard procedures unless otherwise noted.  $\text{CuCl}$  and  $\text{LiOt-Bu}$  were purchased from Aldrich Chemical Co., stored under nitrogen, and used as received. Diethoxymethylsilane was purchased from TCI Co., stored under nitrogen, and used as received. *N,N*-Dimethylacetamide (DMA) was purchased from Kanto Chemical Co., and stored under argon.

## Solvent Screening

Solvent effects were examined with ethyl (*Z*)-3-phenylbut-2-enoate (**1a**) as a substrate using chiral NHC precursor **L1**·HBF<sub>4</sub> (10 mol %), CuCl (10 mol %), KO*t*-Bu (20 mol %), (TMSO)<sub>2</sub>MeSiH (1 equiv) as a reductant, and *t*-BuOH (1 equiv) as a protonation reagent at 25 °C for 15 h (Table S1). In general, aprotic polar solvents were appropriate for the conjugate reduction, giving excellent reactivities with good enantioselectivities (Table S1, entries 1–6). Among them, DMA induced the highest enantioselectivity (Table S1, entry 5). On the other hand, the reaction did not proceed at all in nonpolar solvents, toluene, and dichloromethane (Table S1, entries 7 and 8).

**Table S1:** Optimization of the copper-catalyzed enantioselective conjugate reduction of **1a**.<sup>a</sup>

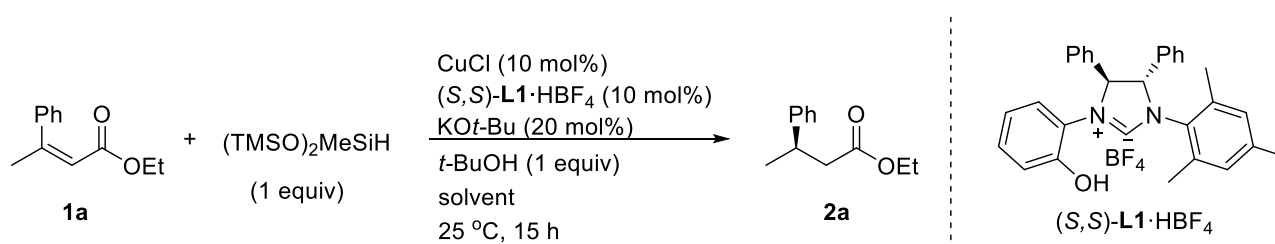

| entry | solvent                         | yield (%) | ee (%) |
|-------|---------------------------------|-----------|--------|
| 1     | THF                             | quant     | 74     |
| 2     | 1,4-dioxane                     | quant     | 68     |
| 3     | MeCN                            | 98%       | 70     |
| 4     | DMF                             | quant     | 74     |
| 5     | DMA                             | quant     | 76     |
| 6     | NMP                             | quant     | 75     |
| 7     | toluene                         | 0         | —      |
| 8     | CH <sub>2</sub> Cl <sub>2</sub> | 0         | —      |

<sup>a</sup>Yield was determined by <sup>1</sup>H NMR analysis using 1,1,2,2-tetrachloroethane as an internal standard. Enantiomeric excess (ee) was determined by HPLC analysis with a chiral stationary phase column CHIRALCEL<sup>®</sup> OD-H.

## Preparation of $\alpha,\beta$ -Unsaturated Esters

### General procedure (A) for the (Z)- $\alpha,\beta$ -unsaturated esters

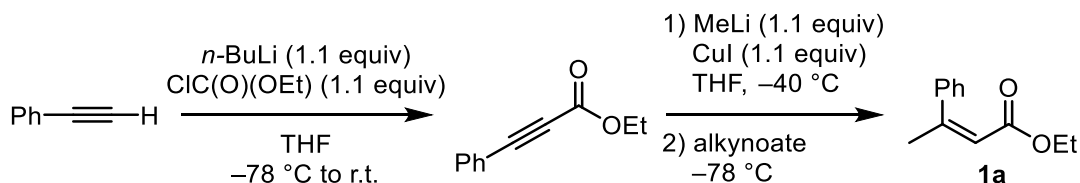

#### Ethyl (Z)-3-phenylbut-2-enoate (**1a**)

Step 1. To a solution of phenylacetylene (11.8 mL, 100 mmol, 1.0 equiv) in THF (200 mL) was added  $n\text{-BuLi}$  (71.0 mL, 1.55 M in hexanes, 110 mmol, 1.1 equiv) dropwise at  $-78\text{ }^{\circ}\text{C}$ . After stirring for 1 h at  $-78\text{ }^{\circ}\text{C}$ , ethyl chloroformate (10.5 mL, 110 mmol, 1.1 equiv) was added dropwise to the resulting mixture and stirred for 1 h at the same temperature. The reaction mixture was gradually warmed to room temperature and stirred overnight. After the addition of saturated  $\text{NH}_4\text{Cl}$  aq, the organic layer was separated, and the aqueous layer was extracted with  $\text{EtOAc}$ . The combined organic layer was dried over  $\text{MgSO}_4$ , filtered, and the solvent was removed under reduced pressure. The crude product was purified by column chromatography (silica gel, 0–5%  $\text{EtOAc}$ /hexane) to yield the alkynoate as yellow oil (17.4 g, 99% yield).

Step 2. To a solution of  $\text{CuI}$  (3.2 g, 15 mmol, 1.1 equiv) in THF was added  $\text{MeLi}$  (14.9 mL, 1.11 M in  $\text{Et}_2\text{O}$ , 16.5 mmol, 1.1 equiv) dropwise at  $-40\text{ }^{\circ}\text{C}$ . After stirring for 1 h at  $-40\text{ }^{\circ}\text{C}$ , the resulting solution was cooled to  $-78\text{ }^{\circ}\text{C}$ . The alkynoate (2.6 g, 15 mmol, 1.0 equiv) was added dropwise to the solution. After stirring for 6 h at  $-78\text{ }^{\circ}\text{C}$ , saturated  $\text{NH}_4\text{Cl}$  aq was added to the reaction mixture, and diluted with  $\text{Et}_2\text{O}$ . The mixture was washed with saturated  $\text{NH}_4\text{Cl}$  aq, dried over  $\text{MgSO}_4$ , and filtered. After removal of the solvent under reduced pressure, the crude product was purified by column chromatography (silica gel, 0–5%  $\text{EtOAc}$ /hexane) to yield **1a** (2.3 g, 82%) as yellow oil.  $^1\text{H}$  NMR (400 MHz,  $\text{CDCl}_3$ )  $\delta$  1.08 (t,  $J = 7.2$  Hz, 3H), 2.17 (d,  $J = 1.6$  Hz, 3H), 3.99 (q,  $J = 7.2$  Hz, 2H), 5.90 (t,  $J = 1.6$  Hz, 1H), 7.19–7.21 (m, 2H), 7.28–7.37 (m, 3H).  $^{13}\text{C}$  NMR (100.5 Hz,  $\text{CDCl}_3$ )  $\delta$  13.9, 27.1, 59.7, 117.7, 126.7, 127.6, 127.8, 140.8, 155.4, 165.9. Spectral data match those reported in the literature.<sup>1</sup>

## General procedure (B) for the (Z)- $\alpha,\beta$ -unsaturated Esters

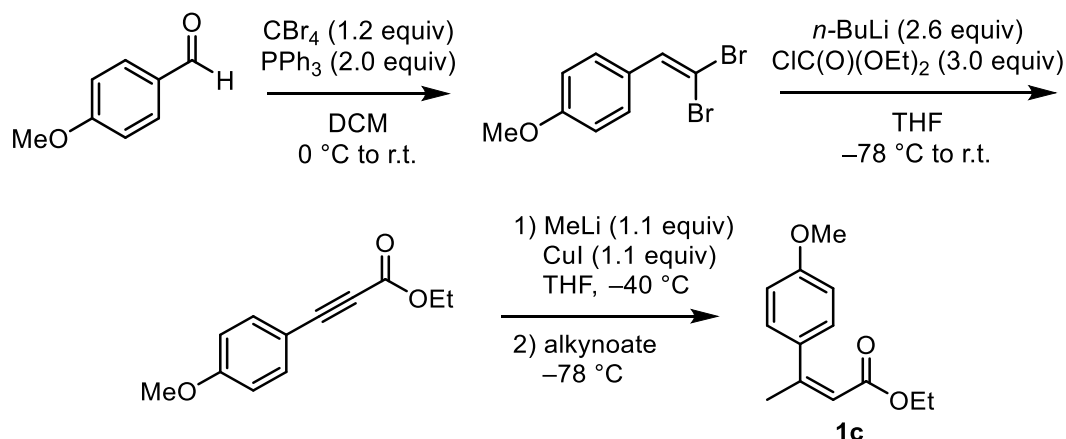

### Ethyl (Z)-3-(4-methoxyphenyl)but-2-enoate (**1c**)

Step 1. To a solution of  $\text{CBr}_4$  (8.0 g, 24 mmol, 1.2 equiv) in dichloromethane were added  $\text{PPh}_3$  (10.7 g, 40 mmol, 2.0 equiv) and 4-methoxybenzaldehyde (2.5 mL, 20 mmol, 1.0 equiv) dropwise at 0 °C. The resulting solution was warmed to room temperature and stirred for 3 h. To the reaction mixture were added hexane and  $\text{H}_2\text{O}$ . The precipitate was filtered through a pad of celite with EtOAc as an eluent. The filtrate was extracted with EtOAc and the combined organic layer was washed with brine. Being dried over  $\text{MgSO}_4$  and filtered, the solvent was removed under reduced pressure. The crude product was purified by column chromatography (silica gel, 0–5–8% EtOAc/hexane) to yield 1,1-dibromoalkene as a pale yellow solid (4.0 g, 68% yield).

Step 2. To a solution of 1,1-dibromoalkene in THF was added *n*-BuLi (23.2 mL, 1.55 M in hexanes, 35.9 mmol, 2.6 equiv) dropwise at –78 °C. After stirring for 1 h at –78 °C, the reaction mixture was gradually warmed to room temperature for 1 h. Ethyl chloroformate (3.9 mL, 41.4 mmol, 3.0 equiv) was added to the reaction solution at –78 °C, then the mixture was warmed to room temperature and stirred for overnight. After the addition of saturated  $\text{NH}_4\text{Cl}$  aq, the mixture was separated, and the aqueous layer was extracted with EtOAc. Combined organic layer was washed with brine, dried over  $\text{MgSO}_4$ , and filtered. After removal of the solvent under the reduced pressure, the crude product was purified by column chromatography (silica gel, 0–7% EtOAc/hexane) to yield the alkynoate as yellow oil (2.4 g, 84% yield).

Step 3. Following the same procedure as the Step 2 in the general procedure A, **1c** was obtained as pale yellow oil (1.6 g, 63% yield).  $^1\text{H}$  NMR (400 MHz,  $\text{CDCl}_3$ )  $\delta$  1.14 (t,  $J$  = 7.2 Hz, 3H), 2.16 (d,  $J$  = 1.2 Hz, 3H), 3.81 (s, 3H), 4.03 (q,  $J$  = 7.2 Hz, 2H), 5.87 (t,  $J$  = 1.2 Hz, 1H), 6.88 (td,  $J$  = 2.4 Hz, 8.8 Hz, 2H), 7.19 (td,  $J$  = 2.4 Hz, 8.8 Hz, 2H).  $^{13}\text{C}$  NMR (100.5 Hz,  $\text{CDCl}_3$ )  $\delta$  14.1, 27.1, 55.2, 59.7, 113.2, 117.0, 128.5, 132.6, 154.9, 159.3, 166.1.

Spectral data match those reported in the literature.<sup>2</sup>

## Procedure for the (Z)- $\beta,\beta$ -diaryl-substituted- $\alpha,\beta$ -unsaturated ester

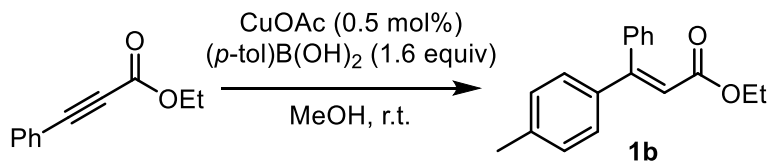

### Ethyl (*E*)-3-phenyl-3-(*p*-tolyl)acrylate (**1b**)

To a solution of  $\text{CuOAc}$  (1.2 mg, 2.0 mmol, 0.5 mol %) and the boronic acid (435 mg, 3.2 mmol, 1.6 equiv) in MeOH was added the alkynoate (348 mg, 2.0 mmol, 1.0 equiv) at room temperature. After stirring overnight, the resulting mixture was filtered through a short plug of silica gel with diethyl ether as an eluent. The solvent was removed under reduced pressure and the crude product was purified by column chromatography (silica gel, 0–5% EtOAc/hexane) to yield **1b** as pale yellow oil (236 mg, 44% yield).  $^1\text{H}$  NMR (400 MHz,  $\text{CDCl}_3$ )  $\delta$  1.10 (t,  $J = 7.2$  Hz, 3H), 2.36 (s, 1H), 4.04 (q,  $J = 7.2$  Hz, 2H), 6.35 (s, 1H), 7.12 (d,  $J = 8.0$  Hz, 2H), 7.18–7.22 (m, 4H) 7.35–7.39 (m, 3H).  $^{13}\text{C}$  NMR (100.5 Hz,  $\text{CDCl}_3$ )  $\delta$  14.0, 21.2, 60.0, 116.5, 127.8, 128.0, 128.2, 129.1, 137.9, 139.1, 139.7, 156.5, 166.2.

Spectral data match those reported in the literature.<sup>3</sup>

## Procedure for the (Z)- $\alpha,\beta$ -unsaturated Amide

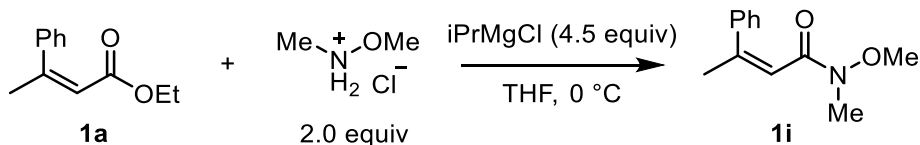

### (Z)-*N*-Methoxy-*N*-methyl-3-phenylbut-2-enamide (**1i**)

To a solution of **1a** (285 mg, 1.5 mmol, 1.0 equiv) and  $\text{N,O}$ -dimethylhydroxylammonium chloride (302 mg, 3.0 mmol, 2.0 equiv) in THF was added  $i\text{PrMgCl}$  (5.3 mL, 1.28 M in THF, 6.75 mmol, 4.5 equiv) dropwise at 0 °C. After stirring for 3 h at 0 °C, the reaction mixture was quenched with saturated  $\text{NH}_4\text{Cl}$  aq and extracted with EtOAc. The combined organic layer was washed with brine, dried over  $\text{MgSO}_4$  and filtered. The solvent was removed under reduced pressure, then the crude product was purified by column chromatography (silica gel, 10–20% EtOAc/hexane) to yield **1i** as pale yellow oil (280 mg, 91% yield).  $^1\text{H}$  NMR (400 MHz,  $\text{CDCl}_3$ )  $\delta$  2.18 (s, 3H), 3.08 (brs, 3H), 3.64 (brs, 3H), 6.28 (brs, 1H), 7.24–7.34 (m, 5H).  $^{13}\text{C}$  NMR (100.5 Hz,  $\text{CDCl}_3$ )  $\delta$  26.5, 31.8, 61.2, 116.7, 126.6, 127.4, 127.7, 140.7, 150.7, 167.1. IR (ATR) 697, 764, 828, 982, 1025, 1113, 1176, 1334, 1381, 1442, 1654, 2937, 2972. HRMS–EI ( $m/z$ ):  $[\text{M}]^+$  calcd for  $\text{C}_{12}\text{H}_{15}\text{NO}_2$ , 205.1103; found, 205.1098.

## Procedure for the (*E*)- $\alpha,\beta$ -unsaturated ester

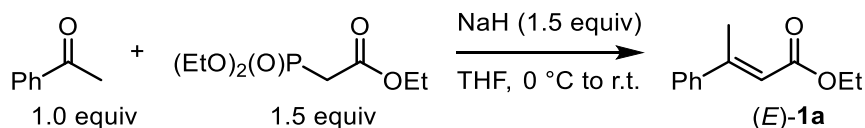

### Ethyl (*E*)-3-phenylbut-2-enoate ((*E*)-1a)

To a solution of NaH (981 mg, 22.5 mmol, 1.5 equiv) in THF (70 mL) was added triethyl phosphonoacetate (4.6 mL, 22.5 mmol, 1.5 equiv) dropwise at 0 °C. After completion of the generation of H<sub>2</sub> gas, acetophenone (1.78 mL, 15 mmol, 1.0 equiv) was added to the reaction mixture. After being stirred at room temperature for 6 h, the resulting mixture was quenched with saturated NH<sub>4</sub>Cl aq. The mixture was extracted with EtOAc. The combined organic layer was washed with brine, dried over MgSO<sub>4</sub> and filtered. After removal of the solvent under vacuum, the crude product was purified by column chromatography (silica gel, 0–1% EtOAc/hexane) to yield (*E*)-1a as pale yellow oil (1.73 g, 60% yield). <sup>1</sup>H NMR (400 MHz, CDCl<sub>3</sub>)  $\delta$  1.31 (t, *J* = 7.2 Hz, 3H), 2.58 (d, *J* = 1.6 Hz, 3H), 4.21 (q, *J* = 7.2 Hz, 2H), 6.14 (t, *J* = 1.6 Hz, 1H), 7.34–7.39 (m, 3H), 7.45–7.49 (m, 2H). <sup>13</sup>C NMR (100.5 Hz, CDCl<sub>3</sub>)  $\delta$  14.3, 17.9, 59.8, 117.1, 126.2, 128.4, 128.9, 142.2, 155.5, 166.8. Spectral data match those reported in the literature.<sup>1</sup>

## Characterization Data for $\alpha,\beta$ -Unsaturated Esters

### Ethyl (*Z*)-3-(4-fluorophenyl)but-2-enoate (1d)

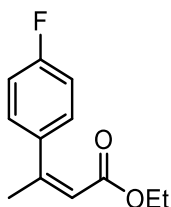

Synthesized from 4-fluorobenzaldehyde with the general procedure B. 1.7 g, 28% yield in 3 steps (20 mmol). Yellow oil. <sup>1</sup>H NMR (400 MHz, CDCl<sub>3</sub>)  $\delta$  1.11 (t, *J* = 7.2 Hz, 3H), 2.16 (d, *J* = 1.2 Hz, 3H), 4.01 (q, *J* = 7.2 Hz, 2H), 5.91 (d, *J* = 1.2 Hz, 1H), 7.03 (tt, *J* = 1.5 Hz, 8.8 Hz, 2H), 7.17–7.20 (m, 2H). <sup>13</sup>C NMR (100.5 Hz, CDCl<sub>3</sub>)  $\delta$  14.0, 27.2, 59.8, 114.8 (d, *J* = 21.0 Hz), 118.0, 128.7 (d, *J* = 8.6 Hz), 136.5 (d, *J* = 2.8 Hz), 154.3, 162.2 (d, *J* = 246.0 Hz), 165.8. IR (ATR) 834, 1045, 1153, 1167, 1225, 1278, 1376, 1443, 1508, 1603, 1639, 1719, 2981. HRMS–EI (*m/z*): [M]<sup>+</sup> calcd for C<sub>12</sub>H<sub>13</sub>O<sub>2</sub>F, 208.0900; found, 208.0897.

### Ethyl (Z)-5-(4-methoxy-4-oxobut-2-en-2-yl)thiophene-2-carboxylate (1e)

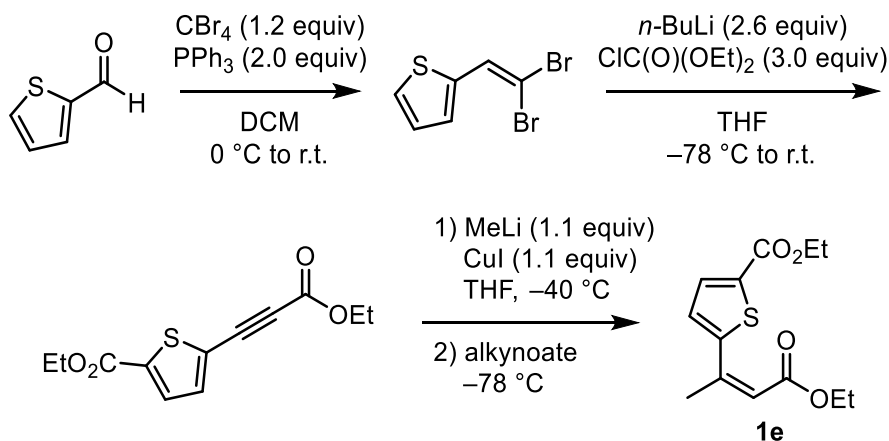

Synthesized from thiophene-2-carbaldehyde with the general procedure B. 413 mg, 8% yield in 3 steps (20 mmol). Orange solid.  $^1\text{H}$  NMR (400 MHz,  $\text{CDCl}_3$ )  $\delta$  1.23 (dt,  $J = 1.2$  Hz, 7.2 Hz, 3H), 1.37 (dt,  $J = 1.2$  Hz, 7.2 Hz, 3H), 2.27 (d,  $J = 1.2$  Hz, 3H), 4.14 (dq,  $J = 1.2$  Hz, 7.2 Hz, 2H), 4.34 (dq,  $J = 1.2$  Hz, 7.2 Hz, 2H), 5.96 (d,  $J = 1.2$  Hz, 1H), 7.32 (d,  $J = 3.6$  Hz, 1H), 7.68-7.70 (m, 1H).  $^{13}\text{C}$  NMR (100.5 Hz,  $\text{CDCl}_3$ )  $\delta$  14.0, 14.3, 27.2, 60.2, 61.1, 119.1, 128.7, 132.6, 134.3, 143.7, 146.8, 162.1, 165.4. IR (ATR) 752, 822, 853, 1097, 1173, 1212, 1252, 1366, 1441, 1520, 1609, 1702, 2979. HRMS–EI ( $m/z$ ):  $[\text{M}]^+$  calcd for  $\text{C}_{13}\text{H}_{16}\text{O}_4\text{S}$ , 268.0769; found, 268.0770.

### Ethyl (Z)-3-methyl-5-phenylpent-2-enoate (1f)

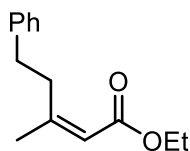

Synthesized from 4-phenyl-1-butyne with the general procedure A. 2.5 g, 76% yield in 2 steps (15 mmol). Colorless oil.  $^1\text{H}$  NMR (400 MHz,  $\text{CDCl}_3$ )  $\delta$  1.27 (t,  $J = 7.2$  Hz, 3H), 1.88 (d,  $J = 1.2$  Hz, 3H), 2.78 (m, 2H), 2.91 (m, 2H), 4.14 (q,  $J = 7.2$  Hz, 2H), 5.69 (d,  $J = 1.2$  Hz, 1H), 7.16-7.30 (m, 5H).  $^{13}\text{C}$  NMR (100.5 Hz,  $\text{CDCl}_3$ )  $\delta$  14.3, 25.5, 34.5, 35.5, 59.5, 116.6, 125.9, 127.6, 128.3, 128.4, 141.6, 159.5, 166.2.

Spectral data match those reported in the literature.<sup>4</sup>

### Benzyl (Z)-3-phenylbut-2-enoate (1g)

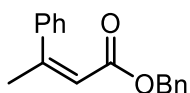

Synthesized with the general procedure A using benzyl chloroformate. 570 mg, 44% yield in 2 steps (5 mmol). Colorless oil.  $^1\text{H}$  NMR (400 MHz,  $\text{CDCl}_3$ )  $\delta$  2.17 (d,  $J = 1.2$  Hz, 3H), 4.99 (s, 2H), 5.96 (t,  $J = 1.2$  Hz, 1H), 7.12-7.14 (m, 2H), 7.18-7.22 (m, 2H), 7.25-7.35 (m, 6H).  $^{13}\text{C}$  NMR (100.5 Hz,



CDCl<sub>3</sub>)  $\delta$  27.2, 65.6, 117.3, 126.8, 127.7, 127.8, 127.9, 128.0, 128.3, 128.5, 135.9, 140.7, 156.0, 165.6. IR (ATR) 695, 738, 1026, 1150, 1226, 1264, 1637, 1723, 3032. HRMS–EI (*m/z*): [M]<sup>+</sup> calcd for C<sub>17</sub>H<sub>16</sub>O<sub>2</sub>, 252.1150; found, 252.1144.

### Isopropyl (*Z*)-3-phenylbut-2-enoate (**1h**)

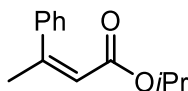

Synthesized with the general procedure A using methyl chloroformate. 776 mg, 33% yield in 2 steps (5 mmol). Pale yellow oil. <sup>1</sup>H NMR (400 MHz, CDCl<sub>3</sub>)  $\delta$  1.05 (d, *J* = 6.0 Hz, 6H), 2.17 (d, *J* = 1.2 Hz, 3H), 4.87 (sep, *J* = 6.0 Hz, 1H), 5.88 (q, *J* = 1.2 Hz, 1H), 7.18-7.21 (m, 2H), 7.28-7.36 (m, 3H). <sup>13</sup>C NMR (100.5 Hz, CDCl<sub>3</sub>)  $\delta$  21.5, 27.0, 67.0, 118.3, 126.8, 127.5, 127.8, 140.9, 154.6, 165.4. IR (ATR) 697, 766, 1024, 1107, 1165, 1230, 1277, 1374, 1442, 1637, 1702, 2979. HRMS–EI (*m/z*): [M]<sup>+</sup> calcd for C<sub>13</sub>H<sub>16</sub>O<sub>2</sub>, 204.1150; found, 204.1148.

## Procedure for the Copper-catalyzed Enantioselective Conjugate Reduction

In a glove box, CuCl (1.5 mg, 0.015 mmol), **L4**·HBF<sub>4</sub> (9.8 mg, 0.015 mmol), and LiO*t*-Bu (2.4 mg, 0.03 mmol) were placed in a vial containing a magnetic stirring bar. The vial was sealed with a teflon-coated silicon rubber septum. *N,N*-Dimethylacetamide (0.90 mL) was added to the vial, and then the mixture was stirred at room temperature for 5 min. Next, *t*-AmOH (16.3  $\mu$ L, 0.15 mmol) was added and stirred at the same temperature, and the vial was taken out of the glove box. To the reaction mixture was added  $\alpha,\beta$ -unsaturated ester (0.15 mmol). After stirring for 5 min at room temperature, diethoxymethylsilane (100.9  $\mu$ L, 0.60 mmol) was added to the mixture. After stirring for 15 h at 25 °C, the reaction mixture was diluted with diethyl ether (1.0 mL) and quenched with H<sub>2</sub>O (0.6 mL). The organic layer was separated, and the aqueous layer was extracted three times. The combined organic layer was filtered through a short plug of silica gel with diethyl ether as an eluent. After the solvent was removed under reduced pressure, the yields of products were determined by <sup>1</sup>H NMR with 1,1,2,2-tetrachloroethane as an internal standard. The pure product was obtained after the purification by GPC (eluent: CHCl<sub>3</sub>).

## Characterization Data for Reduction Products

### Ethyl (*R*)-3-phenylbutanoate (**2a**)

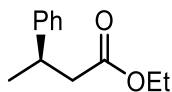

Colorless oil. 15.1 mg, 52%, 90% ee.  $^1\text{H}$  NMR (400 MHz,  $\text{CDCl}_3$ )  $\delta$  1.17 (t,  $J = 7.2$  Hz, 3H), 1.29 (d,  $J = 7.2$  Hz, 3H), 2.50-2.63 (m, 2H), 3.27 (sext,  $J = 7.2$  Hz, 1H), 4.06 (q,  $J = 7.2$  Hz, 2H), 7.16-7.22 (m, 3H), 7.28 (t,  $J = 7.2$  Hz, 2H).  $^{13}\text{C}$  NMR (100.5 Hz,  $\text{CDCl}_3$ )  $\delta$  14.1, 21.7, 36.4, 42.9, 60.2, 126.3, 126.7, 128.4, 145.6, 172.3.

Spectral data match those reported in the literature.<sup>5</sup>

$[\alpha]_{27.3}^{\text{D}} -23.2$  ( $c$  1.25,  $\text{CHCl}_3$ ).

The ee value was determined by chiral HPLC analysis (CHIRALCEL<sup>®</sup> OD-H column, 4.6 mm 250 mm Daicel Chemical Industries, hexane/2-propanol = 98:2, 0.5 mL/min, 40 °C, 220 nm UV detector, retention time = 9.1 min for (*R*)-isomer and 13.2 min for (*S*)-isomer). The absolute configuration of **2a** was assigned by the comparison of the optical rotation with the same compound prepared by reported method.<sup>6</sup>

### Ethyl (*R*)-3-phenyl-3-(*p*-tolyl)propanoate (**2b**)

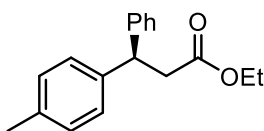

Colorless oil. 23.9 mg, 60%, 75% ee.  $^1\text{H}$  NMR (400 MHz,  $\text{CDCl}_3$ )  $\delta$  1.11 (t,  $J = 7.2$  Hz, 3H), 2.28 (s, 3H), 3.03 (d,  $J = 8.0$  Hz, 2H), 4.02 (q,  $J = 7.2$  Hz, 2H), 4.51 (t,  $J = 8.0$  Hz, 1H), 7.06-7.18 (m, 5H), 7.21-7.28 (m, 4H).  $^{13}\text{C}$  NMR (100.5 Hz,  $\text{CDCl}_3$ )  $\delta$  14.0, 21.0, 40.8, 46.6, 60.4, 126.4, 127.5, 127.6, 128.5, 129.2, 136.0, 140.5, 143.7, 171.9.

Spectral data match those reported in the literature.<sup>3</sup>

$[\alpha]_{27.3}^{\text{D}} -2.57$  ( $c$  1.06,  $\text{CHCl}_3$ ).

The ee value was determined by chiral HPLC analysis (CHIRALCEL<sup>®</sup> OD-3 column, 4.6 mm 250 mm Daicel Chemical Industries, hexane/2-propanol = 99:1, 1.0 mL/min, 220 nm UV detector, retention time = 7.1 min for (*R*)-isomer and 9.8 min for (*S*)-isomer). The absolute configuration of **2b** was assigned by the comparison of HPLC analysis of the reported condition.<sup>3</sup>

### Ethyl (*R*)-3-(4-methoxyphenyl)butanoate (**2c**)

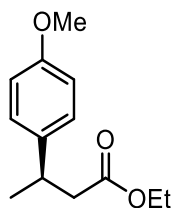

Pale yellow oil. 14.4 mg, 44%, 84% ee.  $^1\text{H}$  NMR (400 MHz,  $\text{CDCl}_3$ )  $\delta$  1.18 (t,  $J = 7.2$  Hz, 3H), 1.27 (d,  $J = 7.2$  Hz, 3H), 2.47-2.60 (m, 2H), 3.23 (sext,  $J = 7.2$  Hz, 1H), 3.78 (s, 3H), 4.07 (q,  $J = 7.2$  Hz, 2H), 6.84 (td,  $J = 2.4$  Hz, 8.8 Hz, 2H), 7.14 (td,  $J = 2.4$  Hz, 8.8 Hz, 2H).  $^{13}\text{C}$  NMR (100.5 Hz,  $\text{CDCl}_3$ )  $\delta$  14.1, 21.9, 35.7, 43.2, 55.2, 60.2, 113.7, 127.6, 137.8, 158.0, 172.4.

Spectral data match those reported in the literature.<sup>5</sup>

$[\alpha]_{27.3}^{\text{D}} -23.1$  ( $c$  1.46,  $\text{CHCl}_3$ ).

The ee value was determined by chiral HPLC analysis (CHIRALCEL<sup>®</sup> OD-H column, 4.6 mm 250 mm Daicel Chemical Industries, hexane/2-propanol = 99:1, 0.5 mL/min, 40 °C, 220 nm UV detector, retention time = 14.2 min for (*R*)-isomer and 16.9 min for (*S*)-isomer).

### Ethyl (*R*)-3-(4-fluorophenyl)butanoate (**2d**)

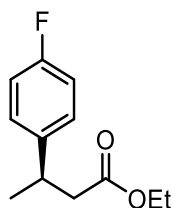

Pale yellow oil. 23.6 mg, 74%, 76% ee.  $^1\text{H}$  NMR (400 MHz,  $\text{CDCl}_3$ )  $\delta$  1.17 (t,  $J = 7.2$  Hz, 3H), 1.28 (d,  $J = 7.2$  Hz, 3H), 2.49-2.60 (m, 2H), 3.27 (sext,  $J = 7.2$  Hz, 1H), 4.06 (q,  $J = 7.2$  Hz, 2H), 6.98 (tt,  $J = 2.4$  Hz, 8.8 Hz, 2H), 7.15-7.20 (m, 2H).  $^{13}\text{C}$  NMR (100.5 Hz,  $\text{CDCl}_3$ )  $\delta$  14.1, 22.0, 35.8, 43.1, 60.3, 115.1 (d,  $J = 20.9$  Hz), 128.1 (d,  $J = 8.6$  Hz), 141.3 (d,  $J = 2.9$  Hz), 161.4 (d,  $J = 243.1$  Hz), 172.2.

Spectral data match those reported in the literature.<sup>5</sup>

$[\alpha]_{27.3}^{\text{D}} -19.7$  ( $c$  1.62,  $\text{CHCl}_3$ ).

The ee value was determined by chiral HPLC analysis (CHIRALCEL<sup>®</sup> IG-3 column, 4.6 mm 250 mm Daicel Chemical Industries, hexane/2-propanol = 99.5:0.5, 0.5 mL/min, 40 °C, 220 nm UV detector, retention time = 22.2 min for (*S*)-isomer and 22.9 min for (*R*)-isomer).

## Ethyl (*R*)-5-(4-ethoxy-oxobutan-2-yl)thiophene-2-carboxylate (**2e**)

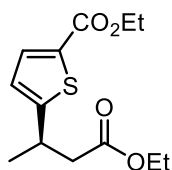

Colorless oil. 30.6 mg, 75%, 84% ee.  $^1\text{H}$  NMR (400 MHz,  $\text{CDCl}_3$ )  $\delta$  1.23 (t,  $J = 7.2$  Hz, 3H), 1.36 (t,  $J = 7.2$  Hz, 3H), 1.39 (d,  $J = 7.2$  Hz, 3H), 2.55-2.70 (m, 2H), 3.59 (sext,  $J = 7.2$  Hz, 1H), 4.12 (q,  $J = 7.2$  Hz, 2H), 4.32 (q,  $J = 7.2$  Hz, 2H), 6.85 (d,  $J = 4.0$  Hz, 1H), 7.63 (d,  $J = 4.0$  Hz, 1H).  $^{13}\text{C}$  NMR (100.5 Hz,  $\text{CDCl}_3$ )  $\delta$  14.1, 14.3, 22.4, 32.4, 43.4, 60.6, 61.0, 124.0, 131.2, 133.3, 157.3, 162.2, 171.4. IR (ATR) 749, 818, 1029, 1088, 1173, 1255, 1280, 1369, 1465, 1705, 1733, 2980. HRMS–EI ( $m/z$ ):  $[\text{M}]^+$  calcd for  $\text{C}_{13}\text{H}_{18}\text{O}_4\text{S}$ , 270.0926; found, 270.0927.

$[\alpha]_{27.5}^{\text{D}} -29.1$  ( $c$  1.46,  $\text{CHCl}_3$ ).

The ee value was determined by chiral HPLC analysis (CHIRALCEL<sup>®</sup> OJ-3 column, 2.1 mm 250 mm Daicel Chemical Industries, and OJ-H column, 4.6 mm 250 mm Daicel Chemical Industries, hexane/2-propanol = 99:1, 0.5 mL/min, 40 °C, 250 nm UV detector, retention time = 45.7 min for (*S*)-isomer and 49.2 min for (*R*)-isomer).

## Ethyl (*R*)-3-methyl-5-phenylpentanoate (**2f**)

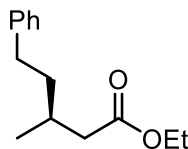

Colorless oil. 14.8 mg, 45%, 85% ee.  $^1\text{H}$  NMR (400 MHz,  $\text{CDCl}_3$ )  $\delta$  1.01 (d,  $J = 7.2$  Hz, 3H), 1.25 (t,  $J = 7.2$  Hz, 3H), 1.46-1.58 (m, 1H), 1.62-1.71 (m, 1H), 2.02 (oct,  $J = 7.2$  Hz, 1H), 2.16 (dd,  $J = 8.0$  Hz, 14.4 Hz, 1H), 2.34 (dd,  $J = 6.0$  Hz, 14.4 Hz, 1H), 2.54-2.69 (m, 2H), 4.12 (q,  $J = 7.2$  Hz, 2H), 7.15-7.19 (m, 3H), 7.25-7.29 (m, 2H).  $^{13}\text{C}$  NMR (100.5 Hz,  $\text{CDCl}_3$ )  $\delta$  14.3, 19.6, 30.1, 33.3, 38.5, 41.8, 60.2, 125.7, 128.2, 128.3, 142.4, 173.1.

Spectral data match those reported in the literature.<sup>7</sup> The ee value was determined by chiral HPLC analysis of 3-methyl-5-phenylpentan-1-ol obtained by the reduction of **2e** using DIBAL-H (Scheme S1) (CHIRALCEL<sup>®</sup> OD-H column, 4.6 mm 250 mm Daicel Chemical Industries, hexane/2-propanol = 97:3, 0.5 mL/min, 40 °C, 220 nm UV detector, retention time = 24.0 min for *S*-isomer and 26.4 min for (*R*)-isomer).

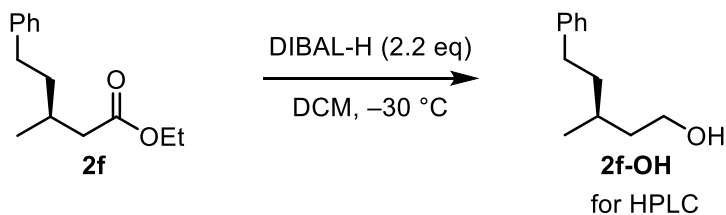

**Scheme S1.** Transformation of **2f**. **2f-OH**:  $[\alpha]_{27.3}^D -11.0$  ( $c$  0.40,  $\text{CHCl}_3$ ).

### Benzyl (*R*)-3-phenylbutanoate (**2g**)

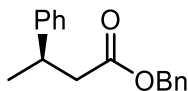

Colorless oil. 20.9 mg, 55%, 70% ee.  $^1\text{H}$  NMR (400 MHz,  $\text{CDCl}_3$ )  $\delta$  1.29 (d,  $J = 7.2$  Hz, 3H), 2.57-2.71 (m, 2H), 3.29 (sext,  $J = 7.2$  Hz, 1H), 5.05 (s, 2H), 7.18-7.24 (m, 5H), 7.26-7.35 (m, 5H).  $^{13}\text{C}$  NMR (100.5 Hz,  $\text{CDCl}_3$ )  $\delta$  21.9, 36.5, 42.9, 66.1, 126.4, 126.7, 128.1, 128.5, 135.8, 145.5, 172.2. Spectral data match those reported in the literature.<sup>8</sup>

$[\alpha]_{27.3}^D -17.4$  ( $c$  1.35,  $\text{CHCl}_3$ ).

The ee value was determined by chiral HPLC analysis (CHIRALCEL<sup>®</sup> OD-H column, 4.6 mm 250 mm Daicel Chemical Industries, hexane/2-propanol = 98:2, 0.5 mL/min, 40 °C, 220 nm UV detector, retention time = 12.5 min for (*R*)-isomer and 19.6 min for (*S*)-isomer).

### Isopropyl (*R*)-3-phenylbutanoate (**2h**)

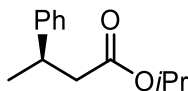

Colorless oil. 24.4 mg, 79%, 83% ee.  $^1\text{H}$  NMR (400 MHz,  $\text{CDCl}_3$ )  $\delta$  1.11 (d,  $J = 6.4$  Hz, 3H), 1.16 (d,  $J = 6.4$  Hz, 3H), 1.29 (d,  $J = 7.2$  Hz, 3H), 2.48-2.61 (m, 2H), 3.26 (sext,  $J = 7.2$  Hz, 1H), 4.94 (sep,  $J = 6.4$  Hz, 1H), 7.17-7.23 (m, 3H), 7.27-7.31 (m, 2H).  $^{13}\text{C}$  NMR (100.5 Hz,  $\text{CDCl}_3$ )  $\delta$  21.6, 21.7, 21.8, 36.6, 43.3, 67.5, 126.3, 126.8, 128.4, 145.7, 171.9.

Spectral data match those reported in the literature.<sup>9</sup>

$[\alpha]_{27.2}^D -21.4$  ( $c$  1.17,  $\text{CHCl}_3$ ).

The ee value was determined by chiral HPLC analysis (CHIRALCEL<sup>®</sup> OD-H column, 4.6 mm 250 mm Daicel Chemical Industries, hexane/2-propanol = 98:2, 0.5 mL/min, 40 °C, 220 nm UV detector, retention time = 8.1 min for (*R*)-isomer and 8.9 min for (*S*)-isomer).

## (*R*)-*N*-Methoxy-*N*-methyl-3-phenylbutanamide (2i)

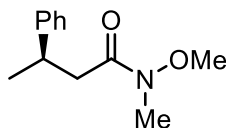

Pale yellow oil. 19.0 mg, 59%, 79% ee.  $^1\text{H}$  NMR (400 MHz,  $\text{CDCl}_3$ )  $\delta$  1.32 (d,  $J = 7.2$  Hz, 3H), 2.62-2.77 (m, 2H), 3.14 (s, 3H), 3.37 (sext,  $J = 7.2$  Hz, 1H), 3.58 (s, 3H), 7.17-7.22 (m, 1H), 7.25-7.32 (m, 4H).  $^{13}\text{C}$  NMR (100.5 Hz,  $\text{CDCl}_3$ )  $\delta$  21.7, 32.0, 35.8, 40.3, 61.2, 126.2, 126.9, 128.4, 146.5, 173.1.

Spectral data match those reported in the literature.<sup>10</sup>

$[\alpha]_{27.3}^{\text{D}}$  3.00 ( $c$  1.15,  $\text{CHCl}_3$ ).

The ee value was determined by chiral HPLC analysis (CHIRALCEL<sup>®</sup> OD-H column, 4.6 mm 250 mm Daicel Chemical Industries, hexane/2-propanol = 98:2, 0.5 mL/min, 40 °C, 220 nm UV detector, retention time = 16.7 min for (*S*)-isomer and 17.7 min for (*R*)-isomer).

## References

- 1) Fronza, G.; Fuganti, C.; Serra, S. *Eur. J. Org. Chem.* **2009**, 35, 6160.
- 2) Scheiper, B.; Bonnekessel, M.; Krause, H.; Fürstner, A. *J. Org. Chem.* **2004**, 69, 3943.
- 3) Itoh, K.; Tsuruta, A.; Ito, J.; Yamamoto, Y.; Nishiyama, H. *J. Org. Chem.* **2012**, 77, 10914.
- 4) Katsukiyo, M.; Masaru, E.; Kazunori, O.; Junji, I.; Akira, H. *Chem. Lett.* **2009**, 38, 832.
- 5) Guo, S.; Zhou, J. *Org. Lett.* **2016**, 18, 5344.
- 6) Appella, D. H.; Moritani, Y.; Shintani, R.; Ferreira, E. M.; Buchwald, S. L. *J. Am. Chem. Soc.* **1999**, 121, 9473.
- 7) Lipshutz, B. H.; Servesko, J. M.; Taft, B. R. *J. Am. Chem. Soc.* **2004**, 126, 8352.
- 8) Yuan, P.; Chen, J.; Zhao, J.; Huang, Y. *Angew. Chem. Int. Ed.* **2018**, 57, 8503.
- 9) Oi, S.; Taira, A.; Honma, Y.; Sato, T.; Inoue, Y. *Tetrahedron Asymmetry* **2006**, 17, 598.
- 10) Shintani, R.; Kimura, T.; Hayashi, T. *Chem. Commun.* **2005**, 3213.

## HPLC Charts

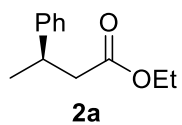

racemic

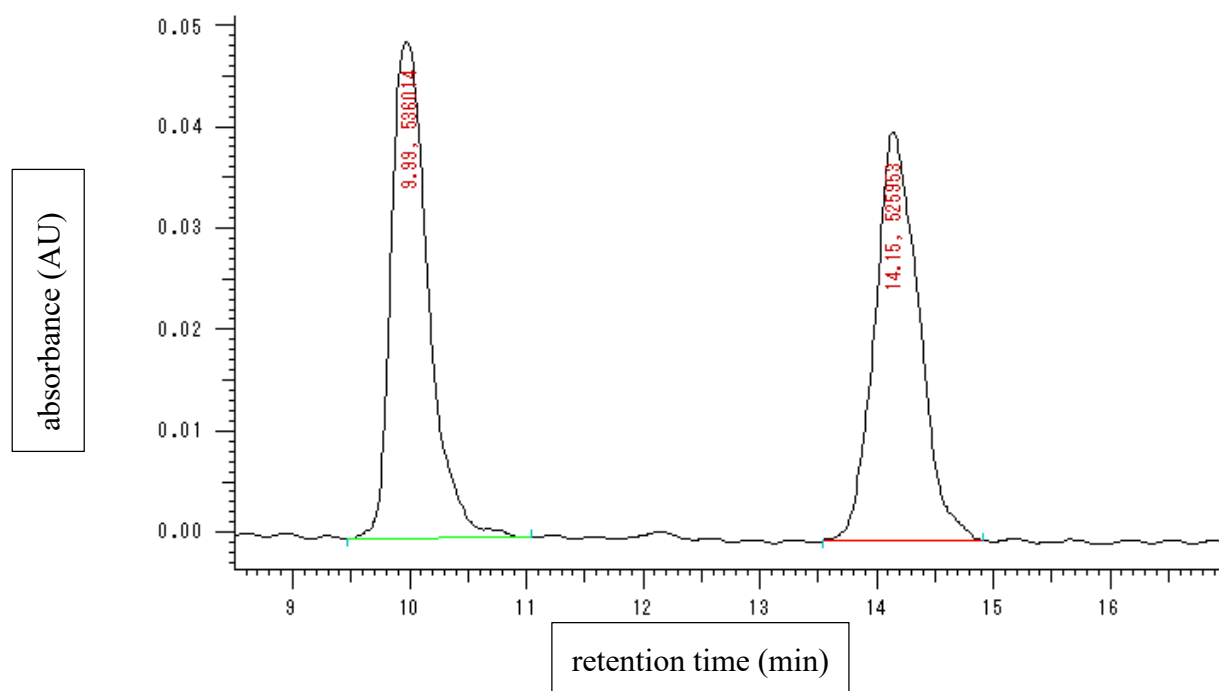

chiral

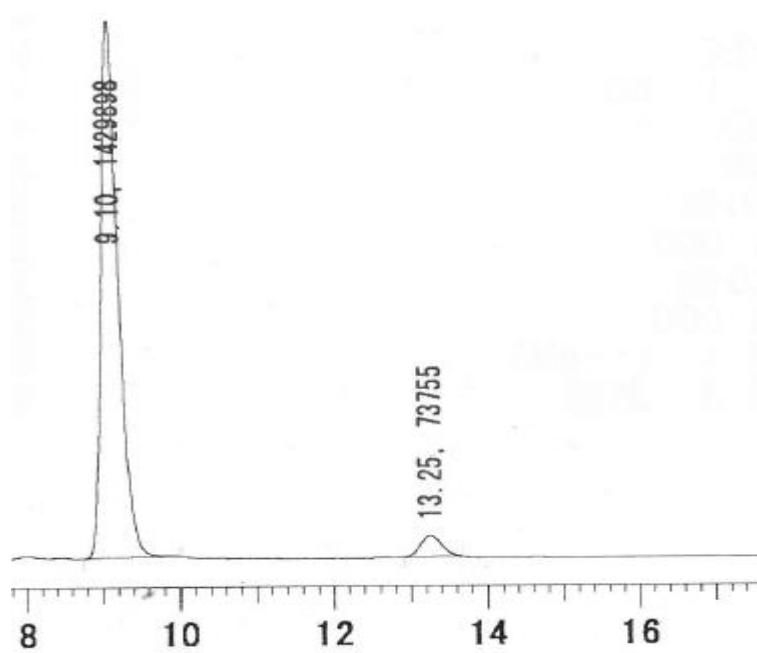

**(S)-2a**

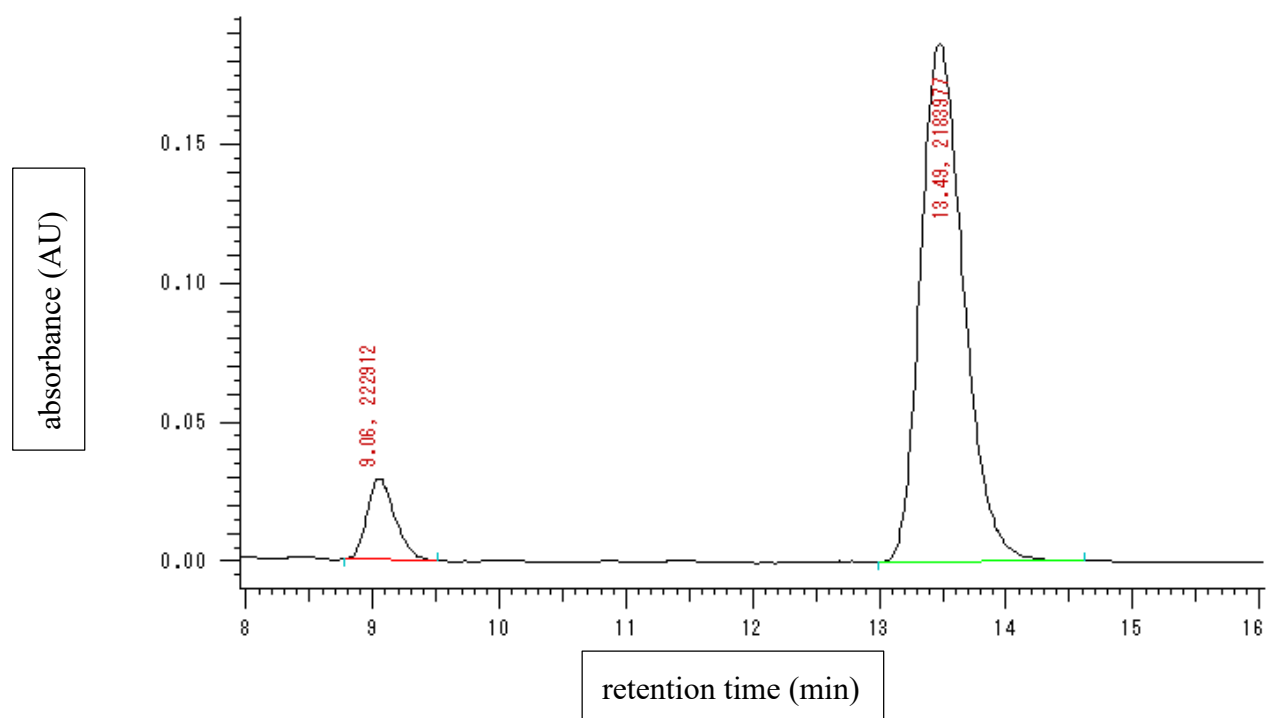

| racemic |          |        |          | chiral |          |         |          | (S)-2a |          |         |          |
|---------|----------|--------|----------|--------|----------|---------|----------|--------|----------|---------|----------|
| no.     | RT (min) | area   | area (%) | no.    | RT (min) | area    | area (%) | no.    | RT (min) | area    | area (%) |
| 1       | 9.99     | 536014 | 50.474   | 1      | 9.10     | 1429898 | 95.095   | 1      | 9.06     | 222912  | 9.336    |
| 2       | 14.15    | 525953 | 49.526   | 2      | 13.25    | 73755   | 4.905    | 2      | 13.49    | 2164843 | 90.664   |



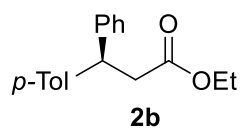

racemic

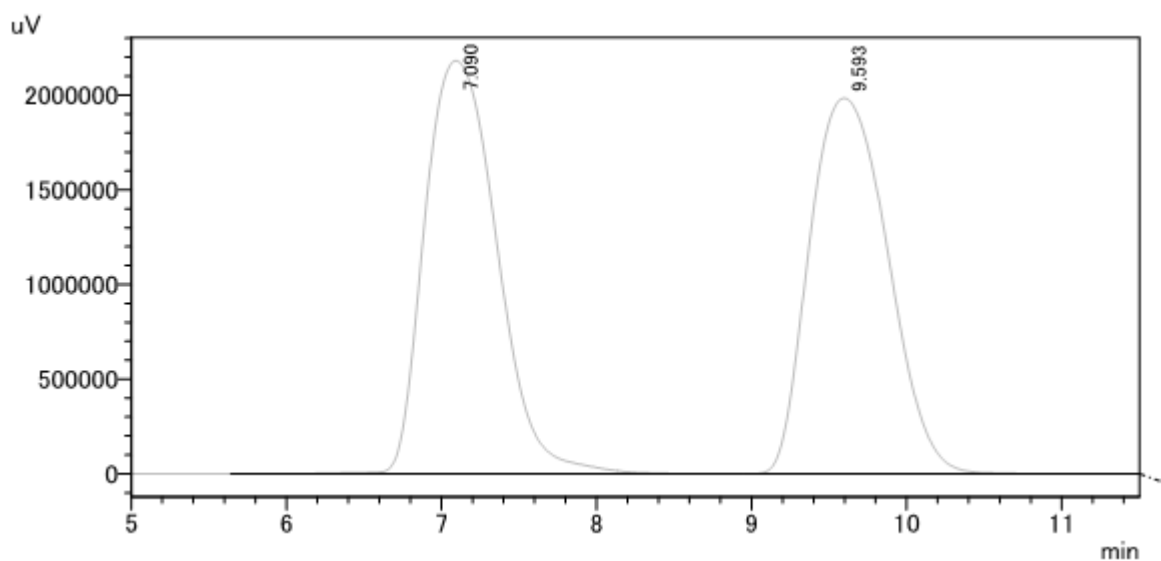

chiral

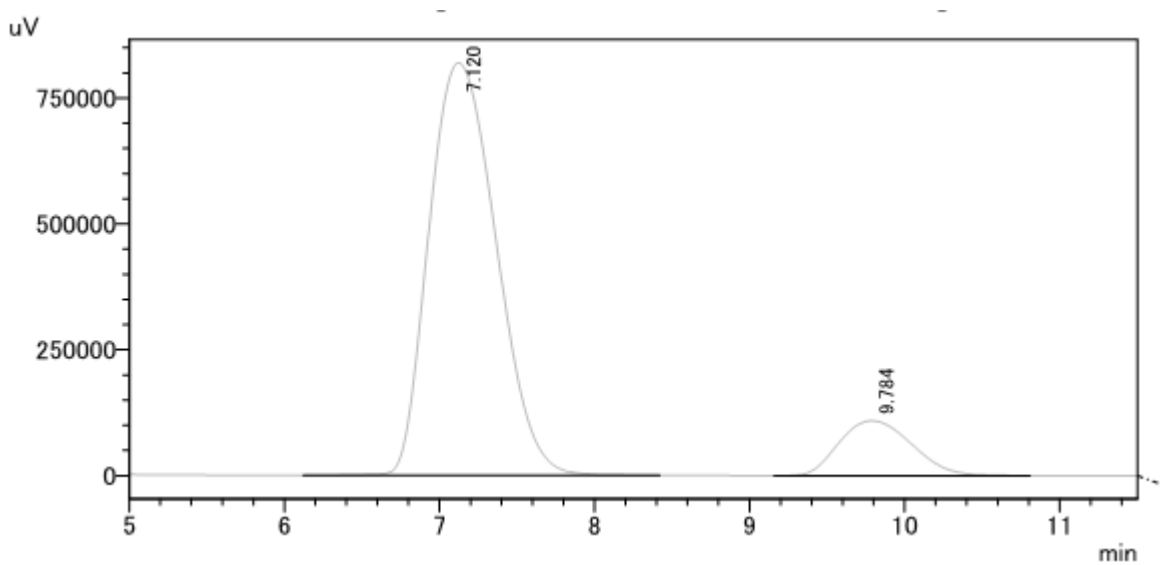

racemic

chiral

| no. | RT (min) | area     | area (%) | no. | RT (min) | area     | area (%) |
|-----|----------|----------|----------|-----|----------|----------|----------|
| 1   | 7.090    | 70690499 | 50.267   | 1   | 7.120    | 24674408 | 87.454   |
| 2   | 9.593    | 69939532 | 49.733   | 2   | 9.784    | 3539639  | 12.546   |

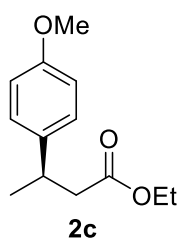

racemic

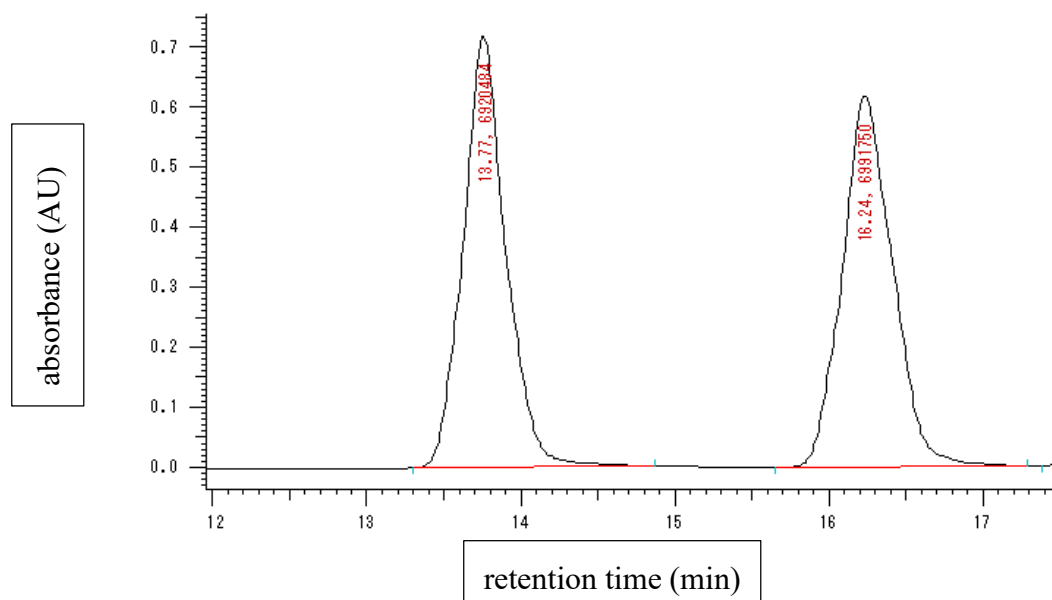

chiral

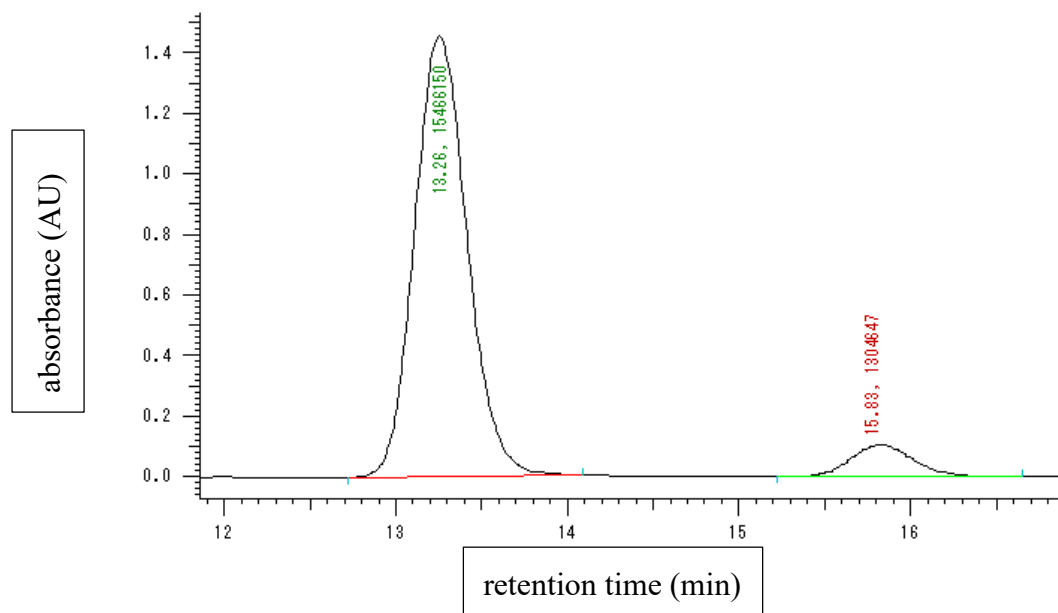

racemic

chiral

| no. | RT (min) | area    | area (%) | no. | RT (min) | area     | area (%) |
|-----|----------|---------|----------|-----|----------|----------|----------|
| 1   | 13.77    | 6920484 | 49.744   | 1   | 13.26    | 15466150 | 92.221   |
| 2   | 16.24    | 6991750 | 50.256   | 2   | 15.83    | 1304647  | 7.779    |

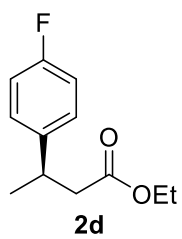

racemic

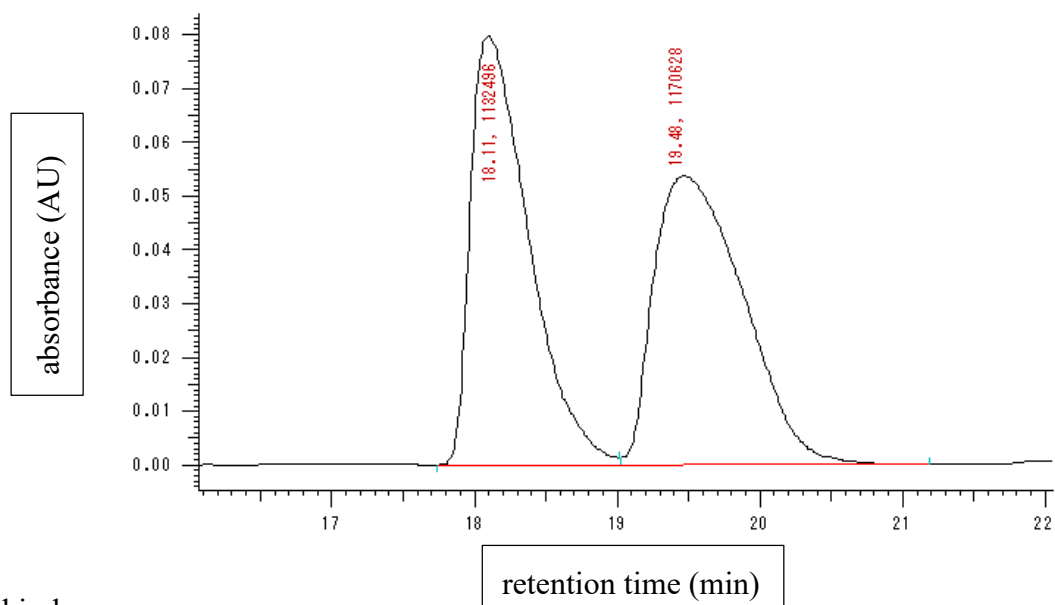

chiral

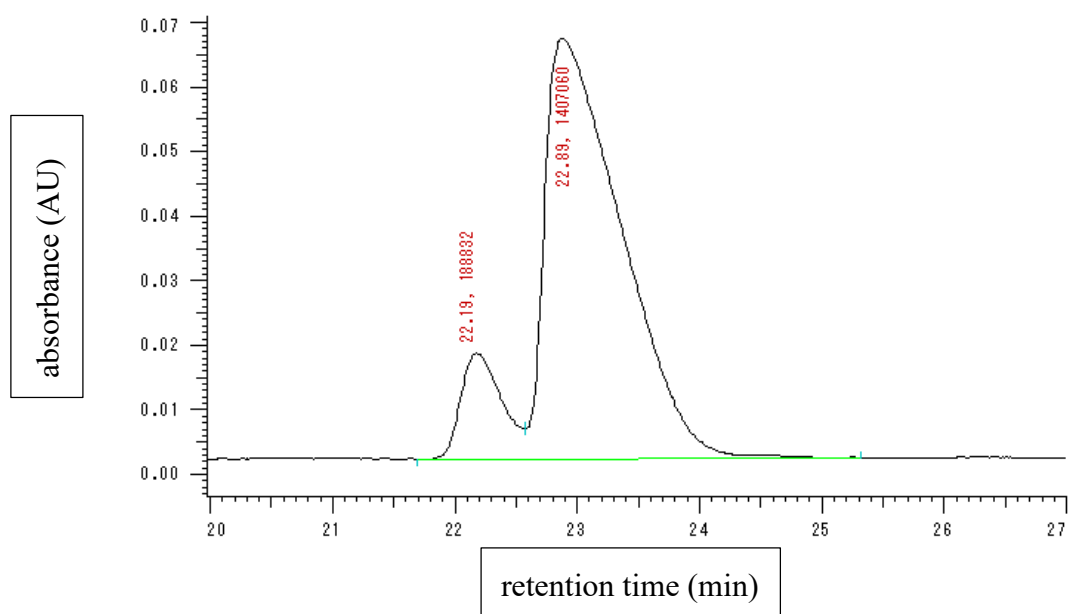

racemic

chiral

| no. | RT (min) | area    | area (%) | no. | RT (min) | area    | area (%) |
|-----|----------|---------|----------|-----|----------|---------|----------|
| 1   | 18.11    | 1132496 | 49.172   | 1   | 22.19    | 188832  | 11.832   |
| 2   | 19.48    | 1170628 | 50.828   | 2   | 22.89    | 1407060 | 88.168   |

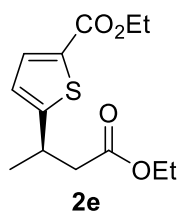

racemic

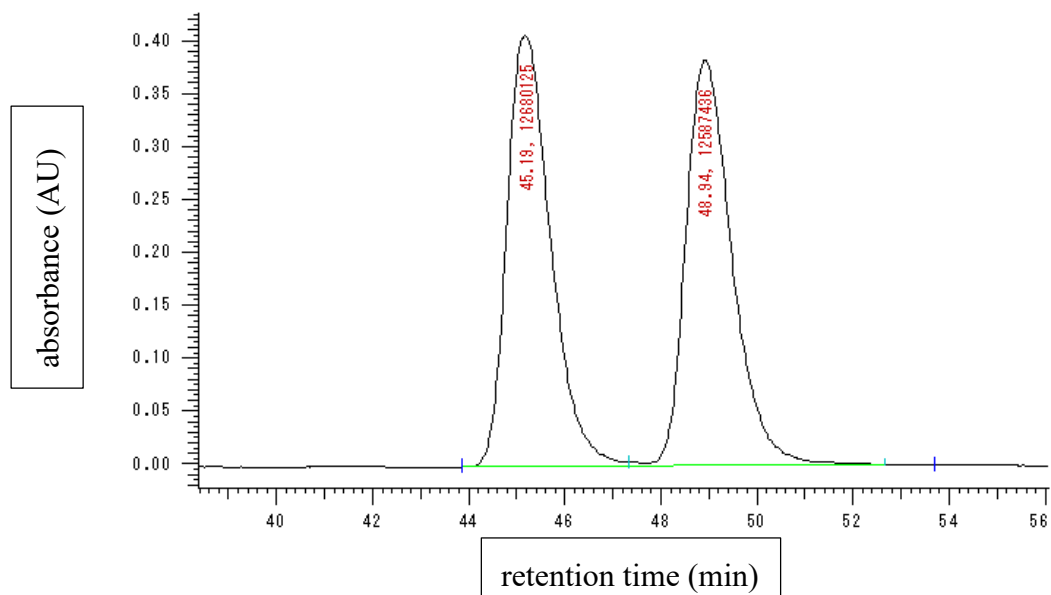

chiral

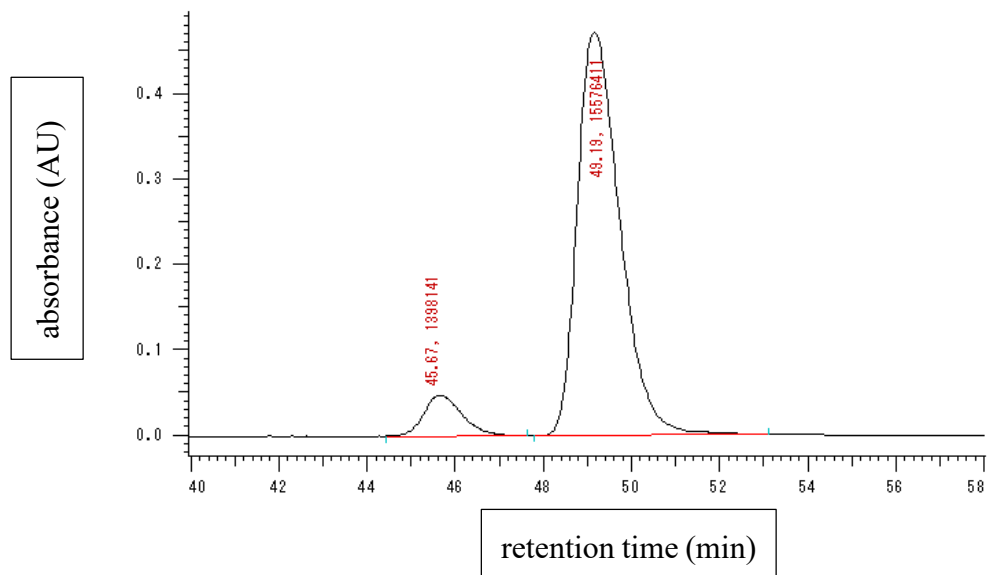

racemic

chiral

| no. | RT (min) | area     | area (%) | no. | RT (min) | area     | area (%) |
|-----|----------|----------|----------|-----|----------|----------|----------|
| 1   | 45.19    | 12680125 | 50.183   | 1   | 45.67    | 1398141  | 8.237    |
| 2   | 48.94    | 12587436 | 49.817   | 2   | 49.19    | 15576411 | 91.763   |

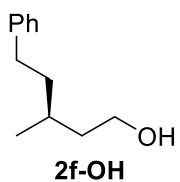

racemic

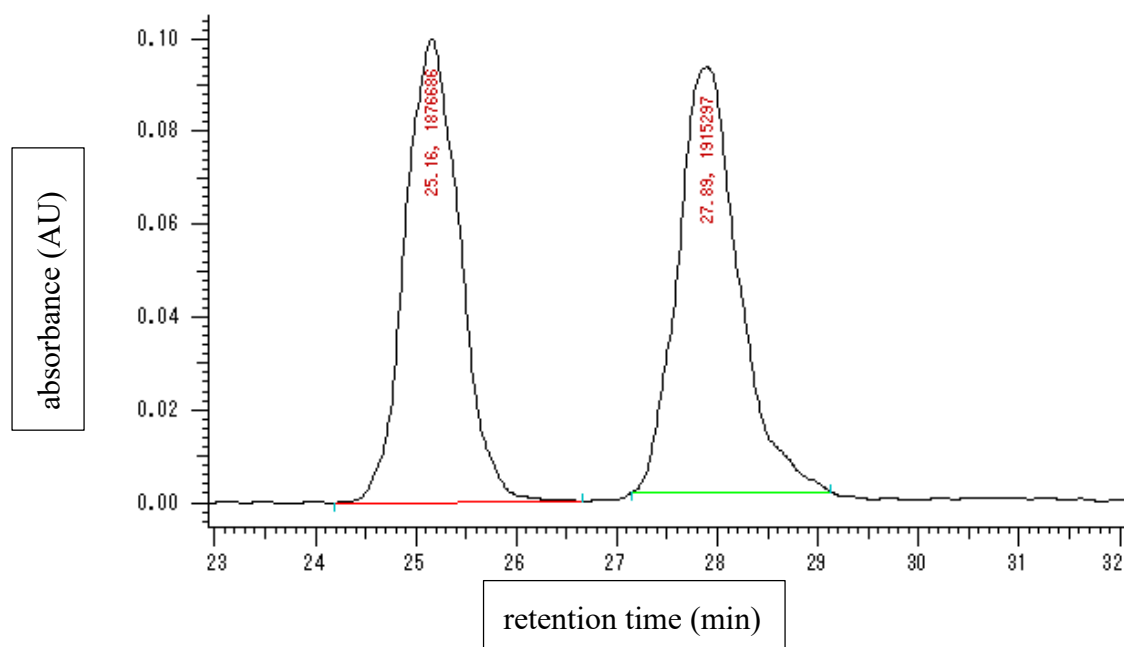

chiral

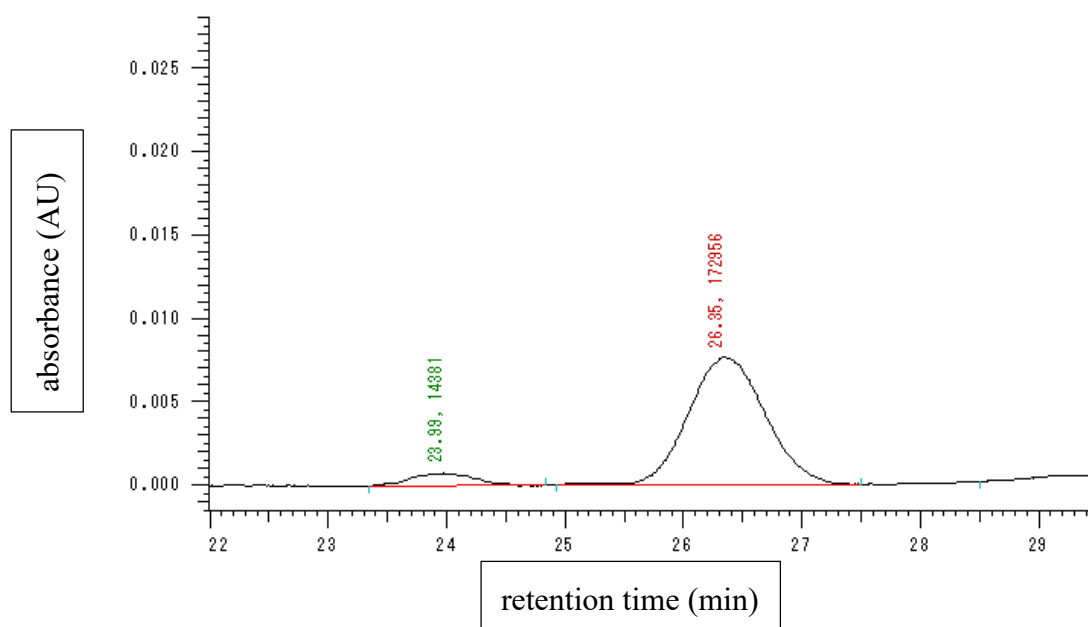

racemic

chiral

| no. | RT (min) | area    | area (%) | no. | RT (min) | area   | area (%) |
|-----|----------|---------|----------|-----|----------|--------|----------|
| 1   | 25.16    | 1876846 | 48.220   | 1   | 23.99    | 14381  | 7.677    |
| 2   | 27.89    | 2015415 | 51.780   | 2   | 26.35    | 172956 | 92.323   |

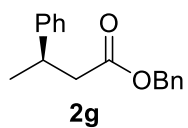

racemic

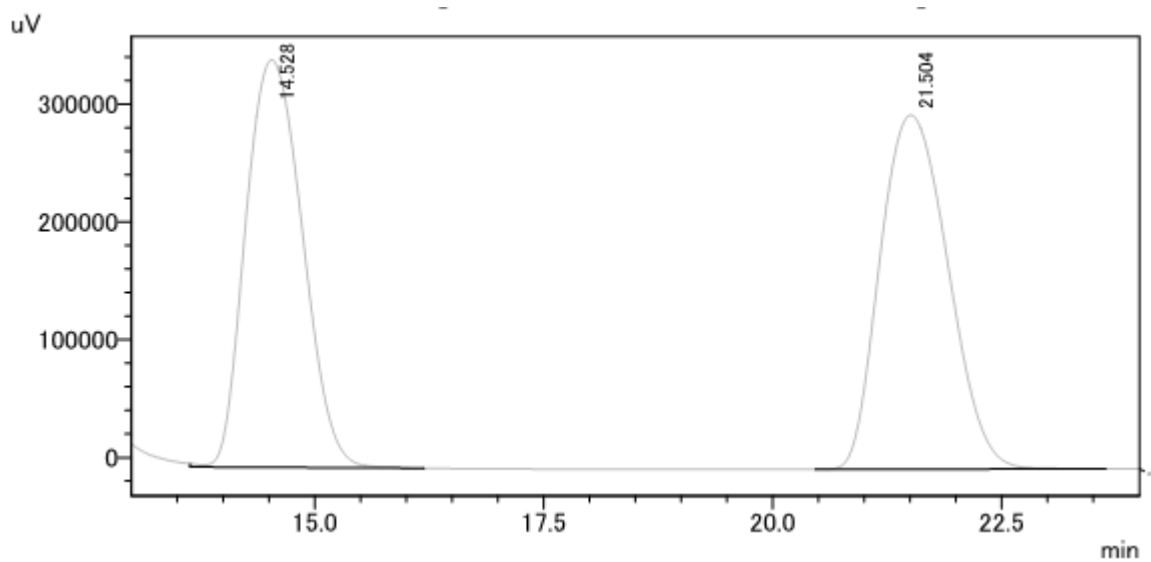

chiral

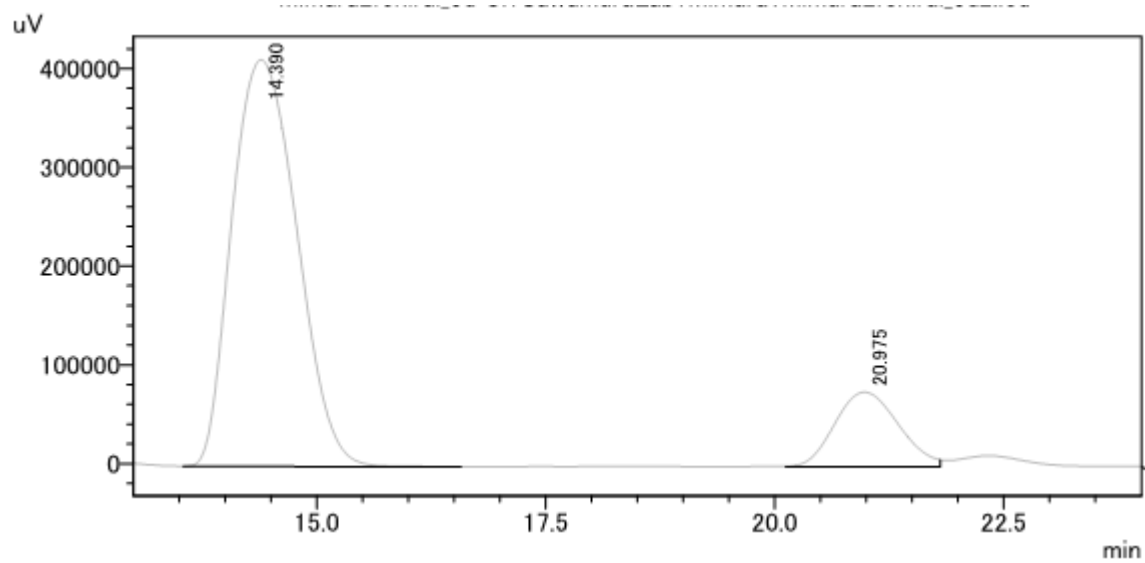

racemic

chiral

| no. | RT (min) | area     | area (%) | no. | RT (min) | area     | area (%) |
|-----|----------|----------|----------|-----|----------|----------|----------|
| 1   | 14.528   | 14901109 | 49.020   | 1   | 14.390   | 20309892 | 84.832   |
| 2   | 21.504   | 15496605 | 50.980   | 2   | 20.975   | 3631436  | 15.168   |

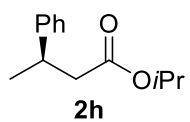

racemic

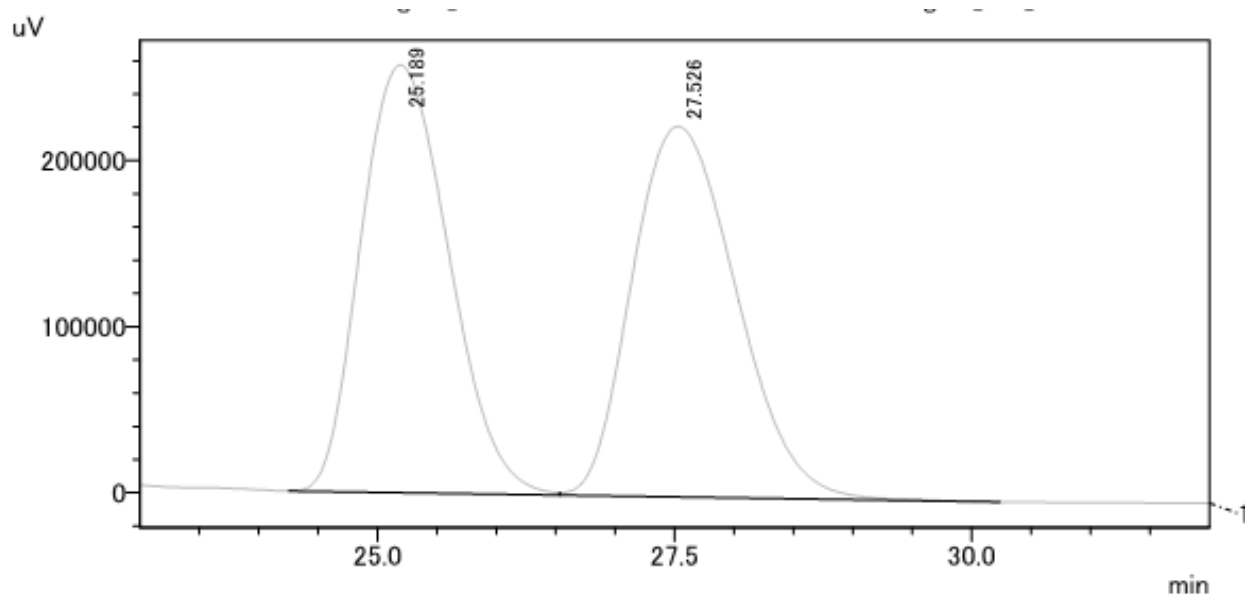

chiral

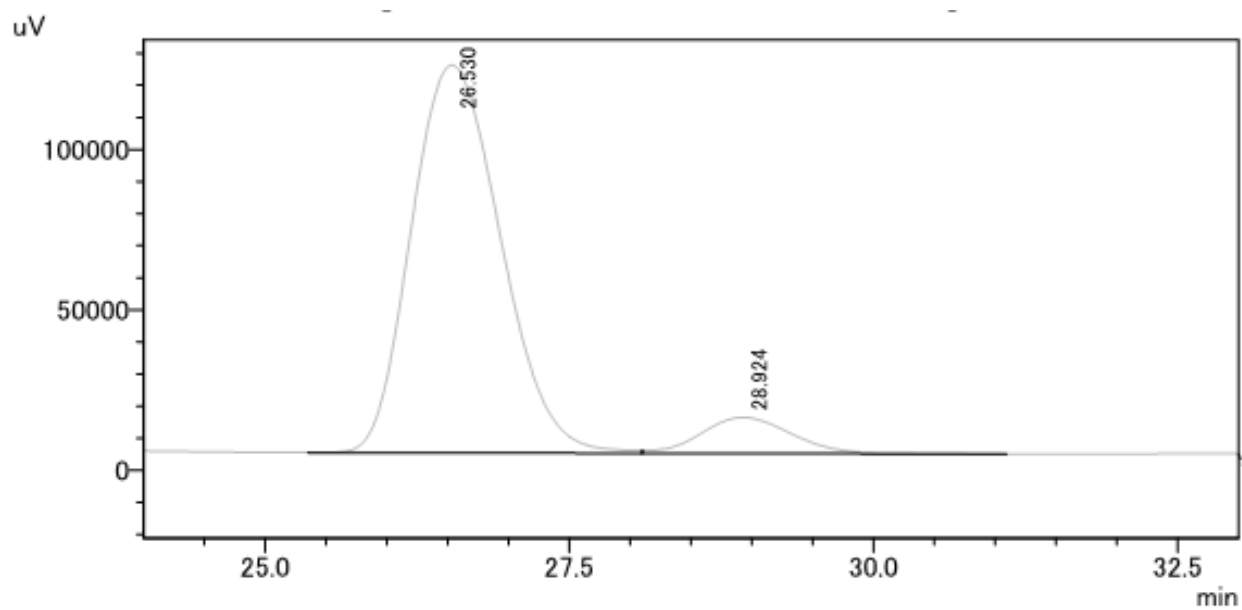

racemic

chiral

| no. | RT (min) | area     | area (%) | no. | RT (min) | area    | area (%) |
|-----|----------|----------|----------|-----|----------|---------|----------|
| 1   | 25.189   | 13240552 | 49.281   | 1   | 26.530   | 6169064 | 91.304   |
| 2   | 27.526   | 13627152 | 50.719   | 2   | 28.924   | 587574  | 8.696    |

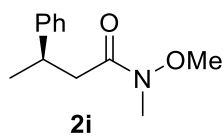

racemic

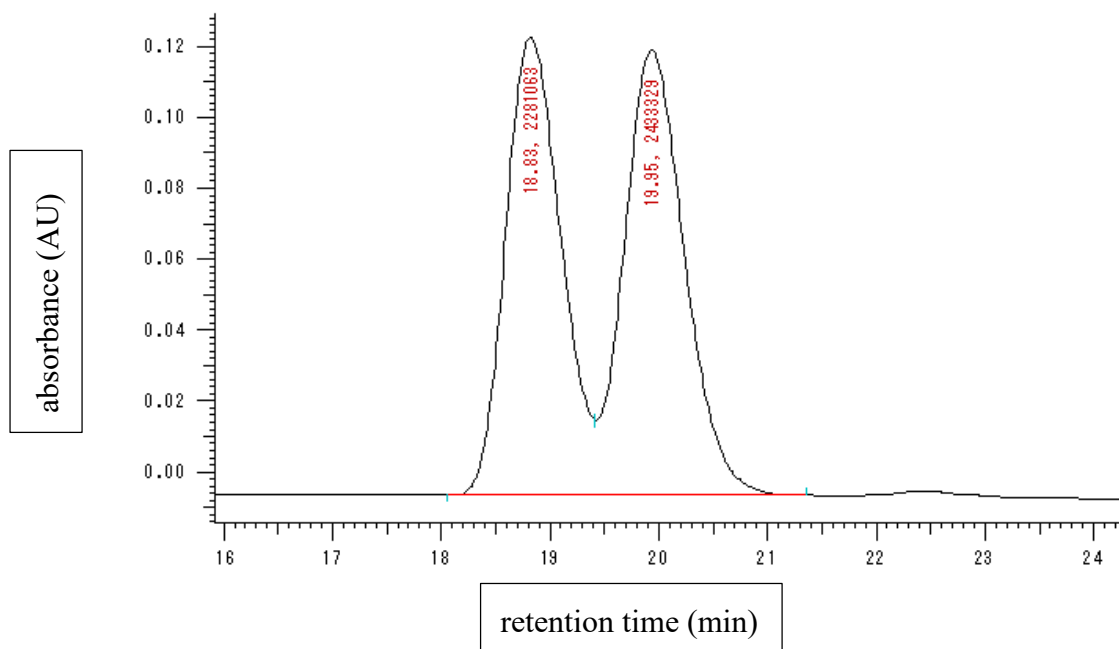

chiral

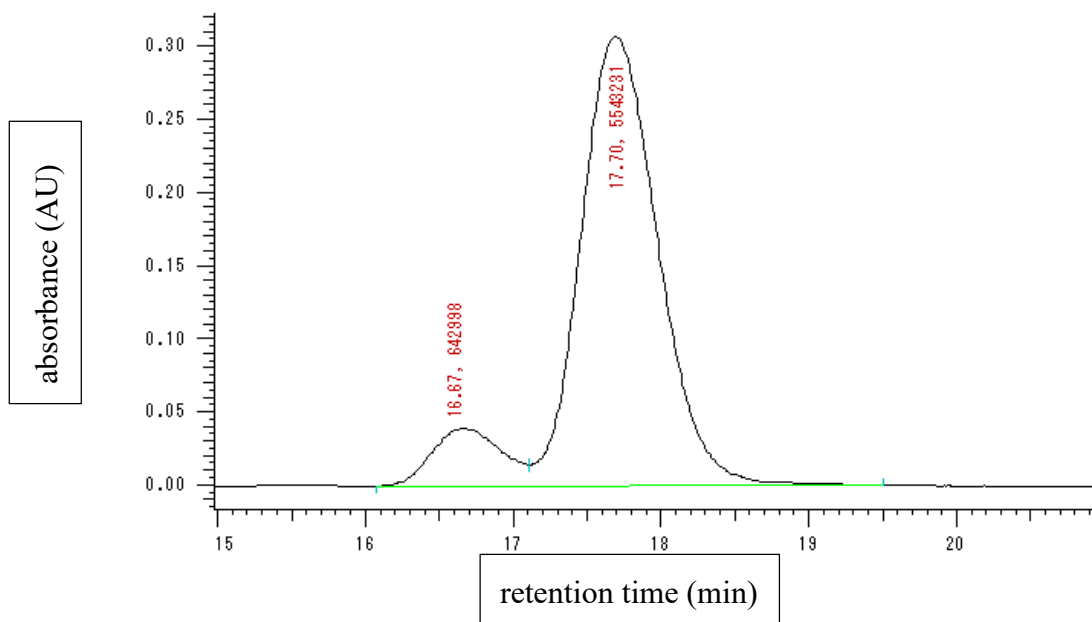

racemic

chiral

| no. | RT (min) | area    | area (%) | no. | RT (min) | area    | area (%) |
|-----|----------|---------|----------|-----|----------|---------|----------|
| 1   | 18.83    | 2281063 | 48.385   | 1   | 16.67    | 642998  | 10.394   |
| 2   | 19.95    | 2433329 | 51.615   | 2   | 17.70    | 5543231 | 89.606   |



# NMR Spectra

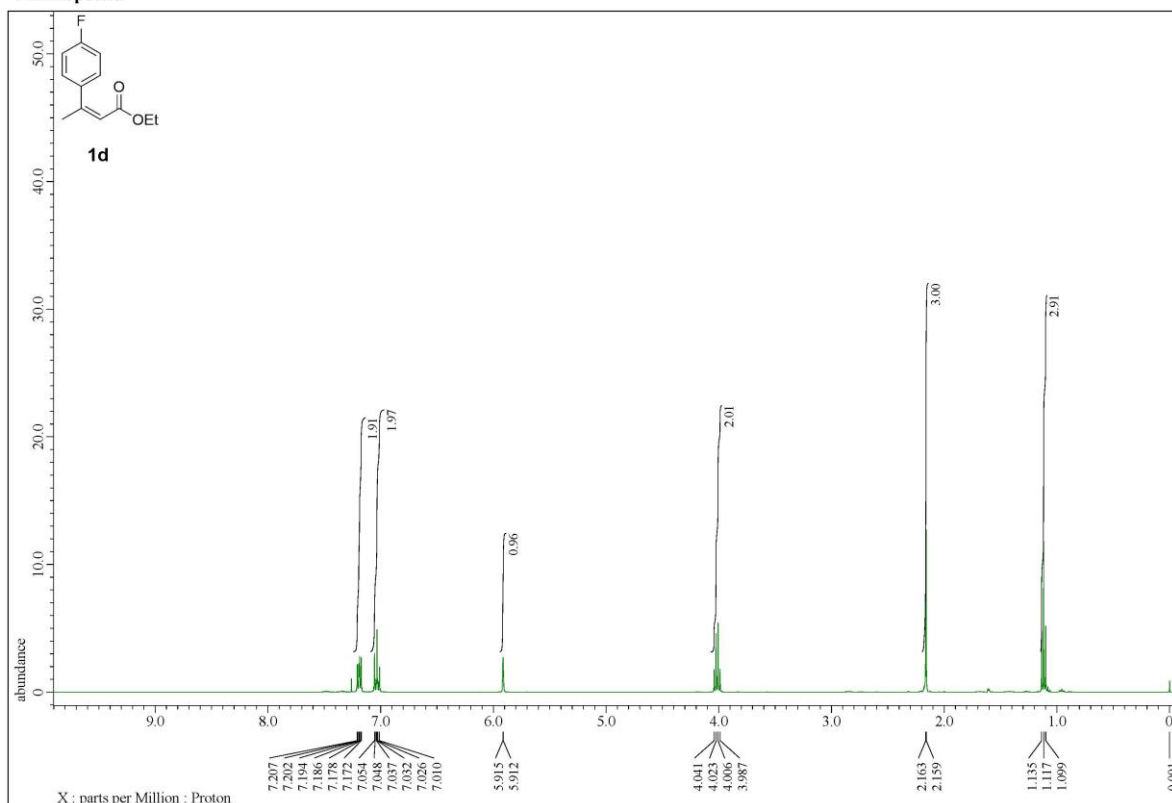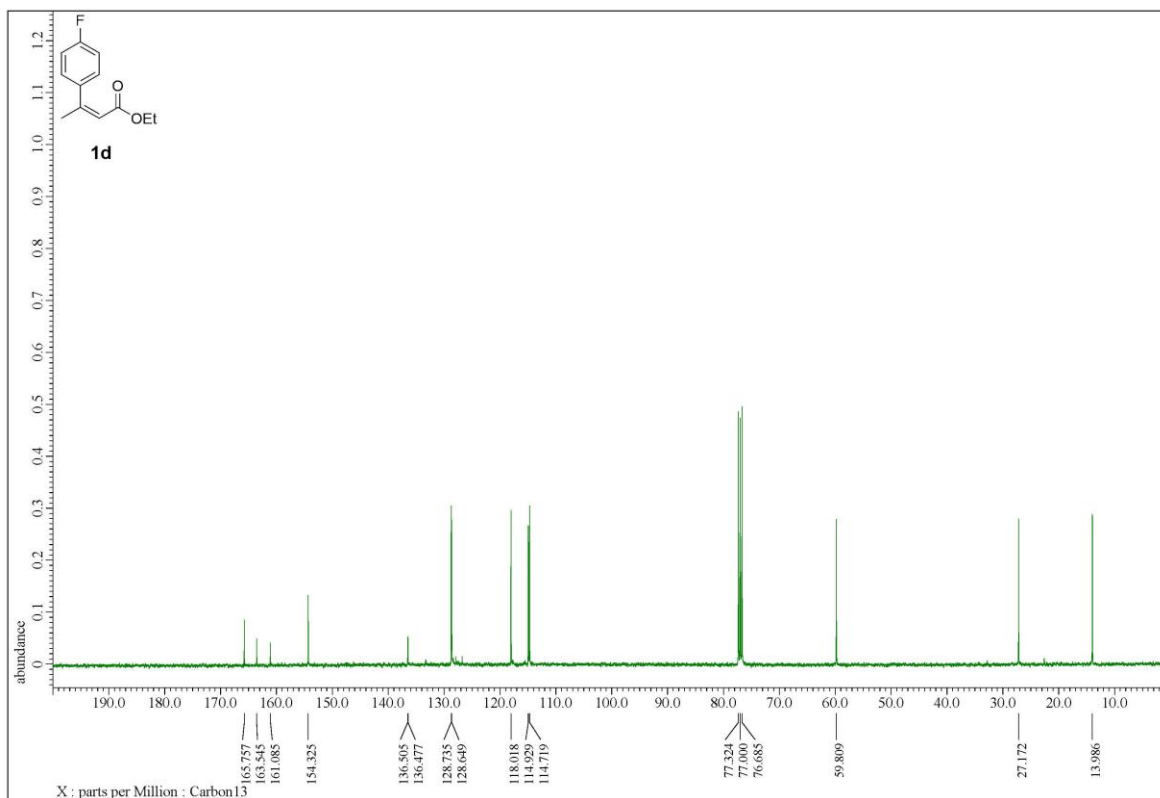

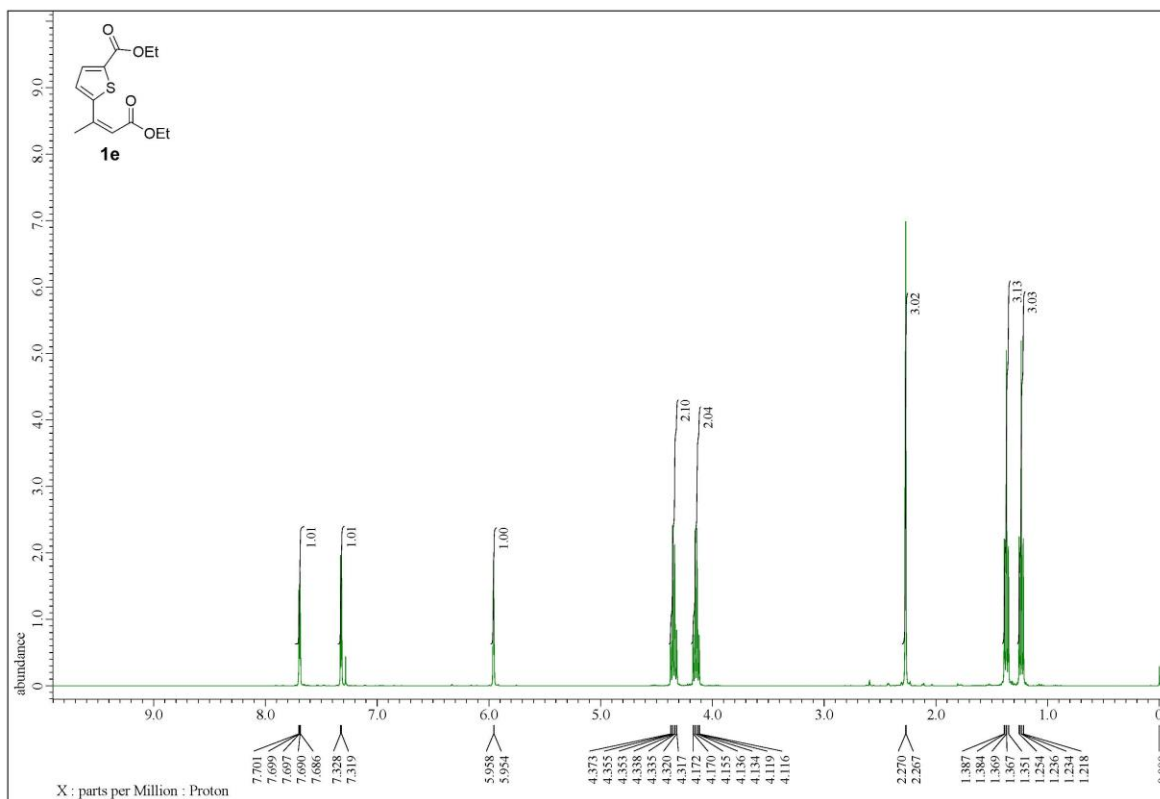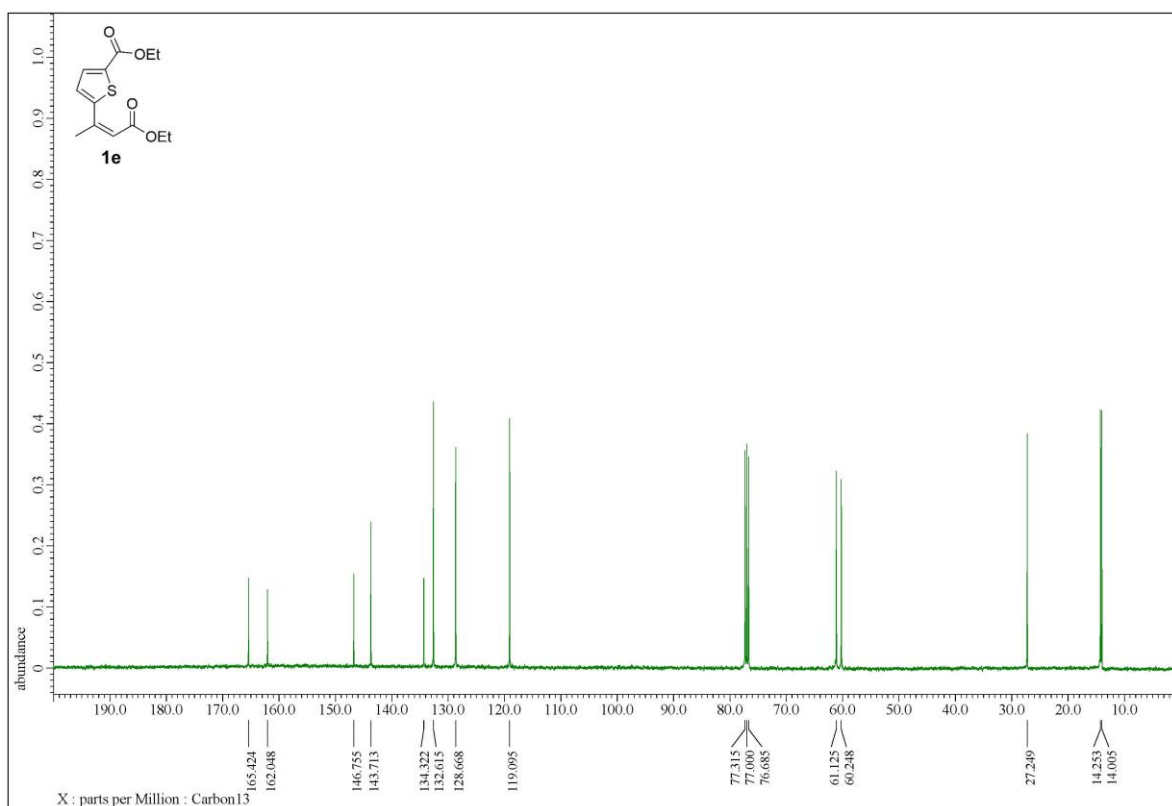

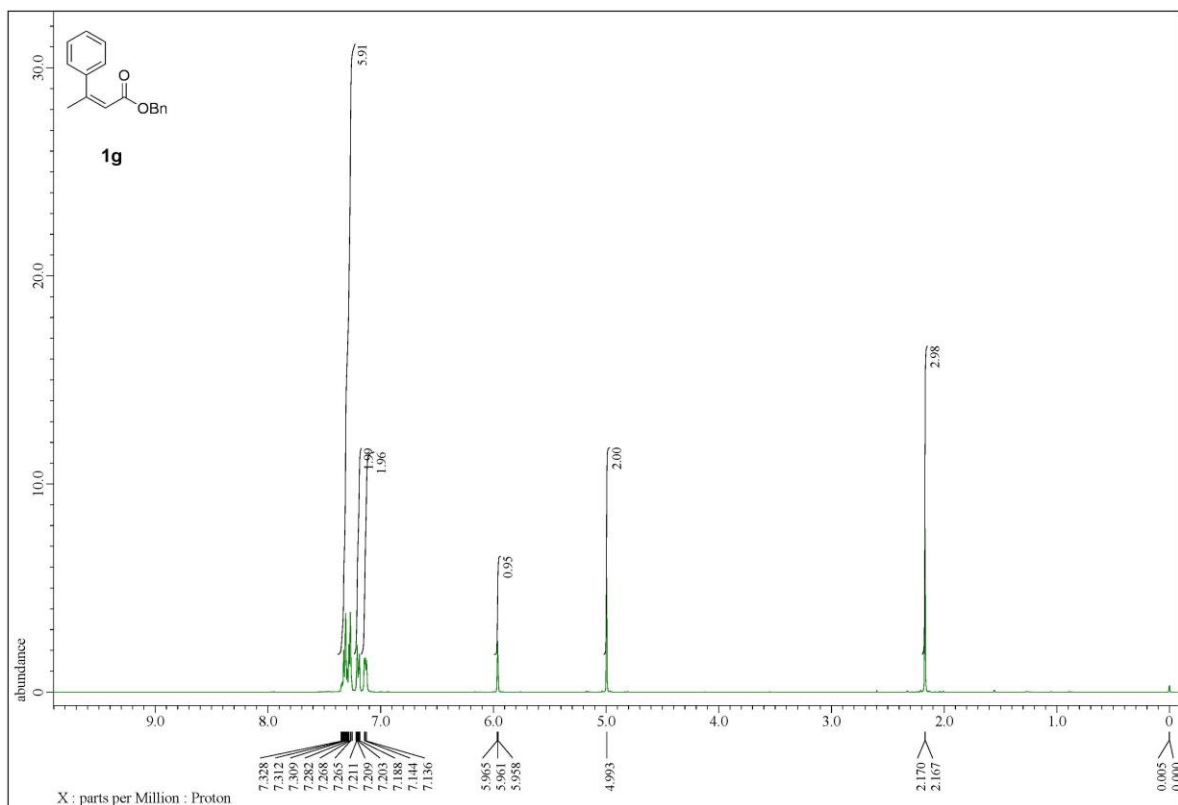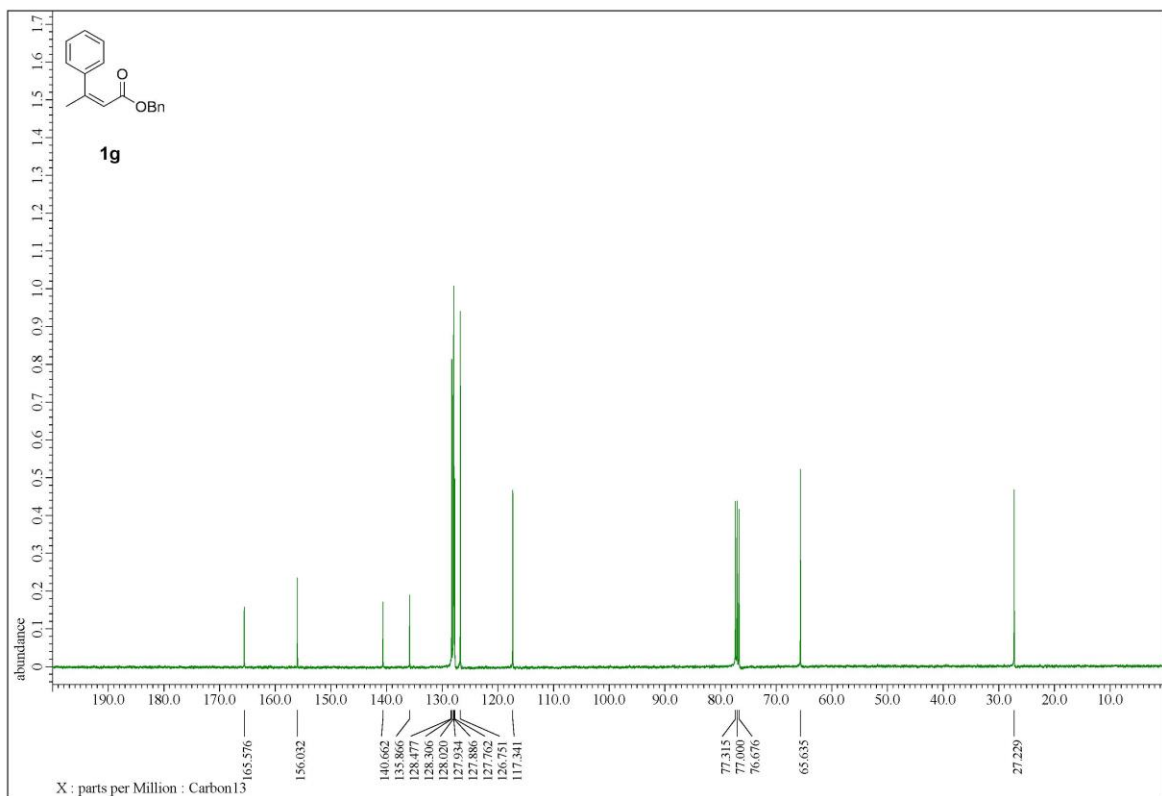

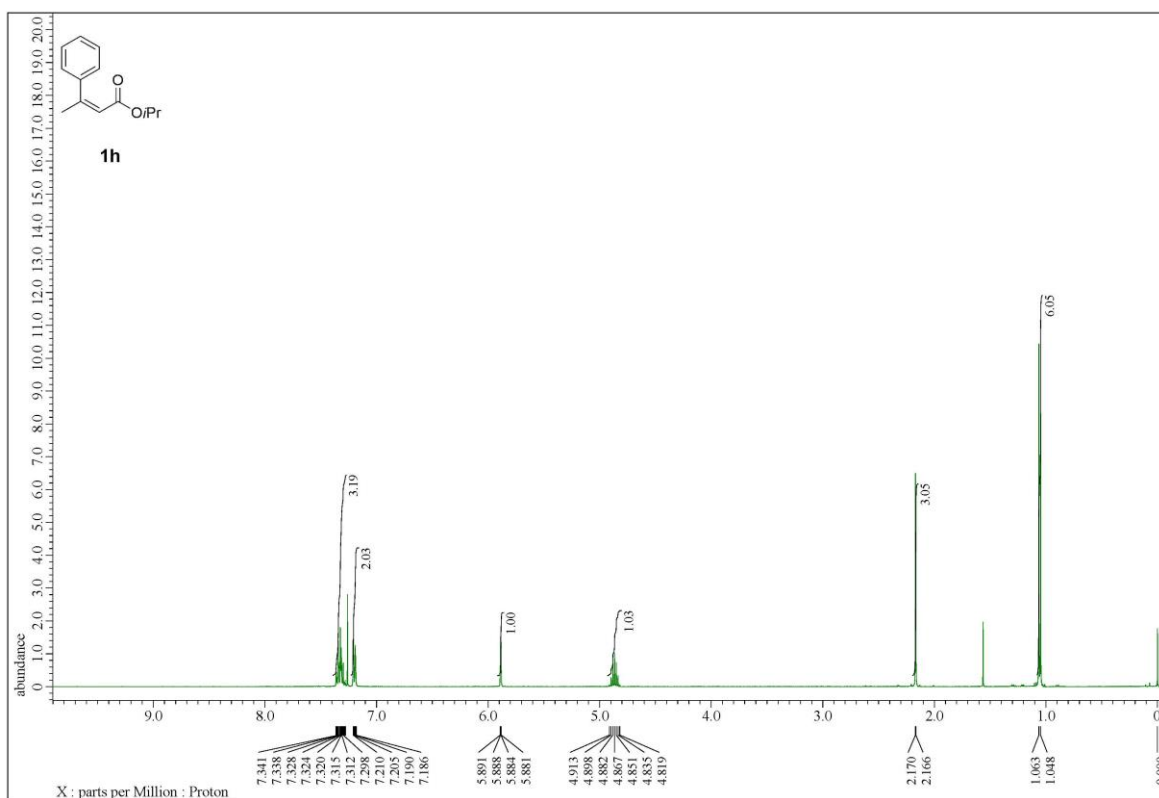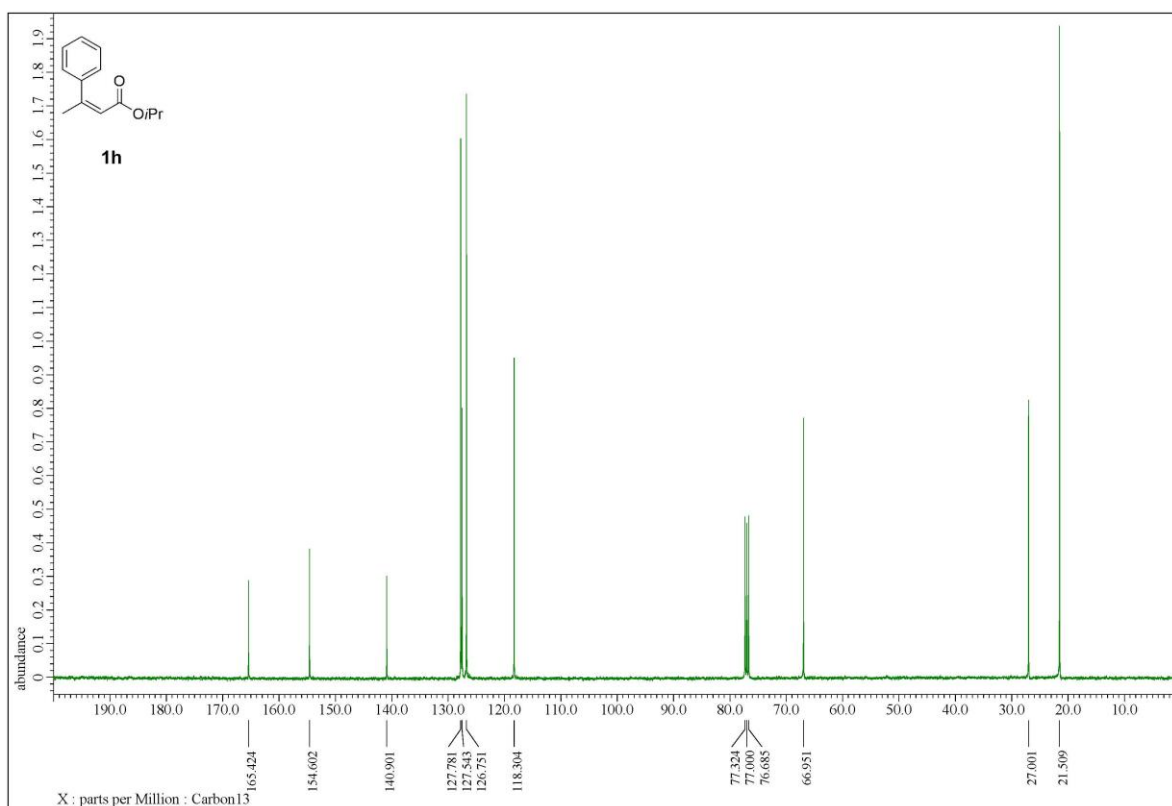

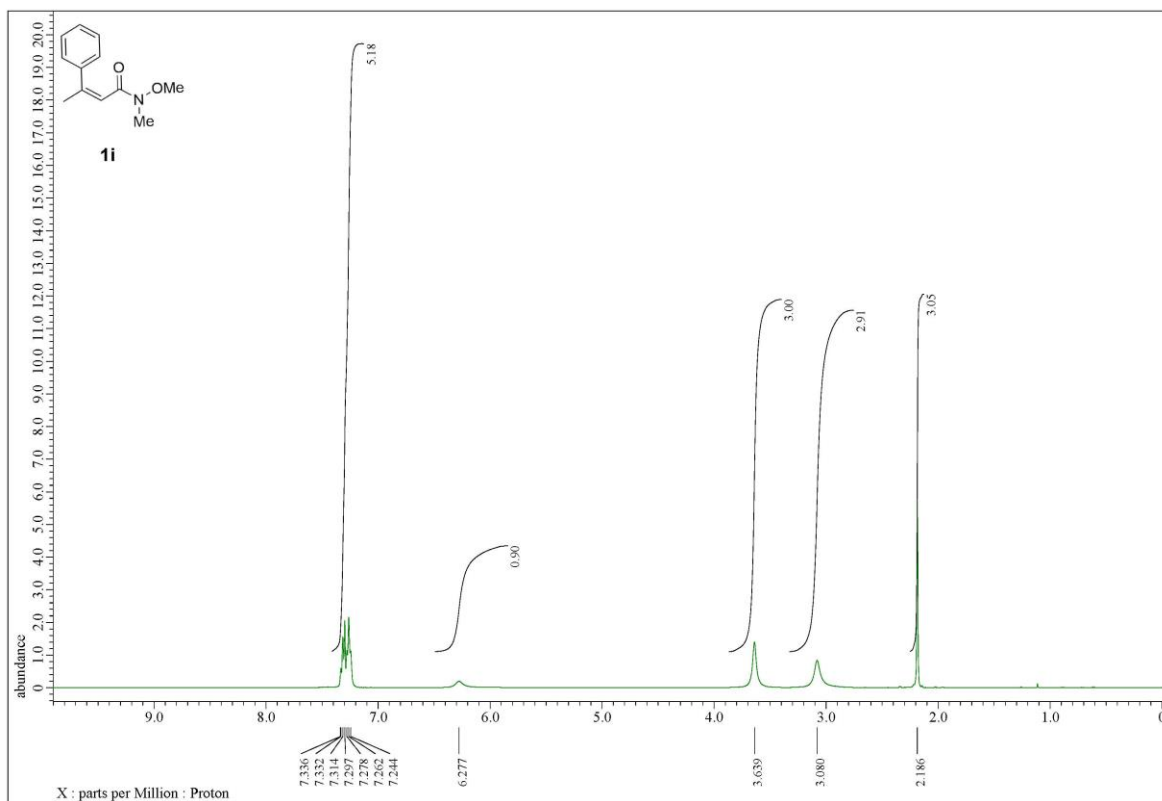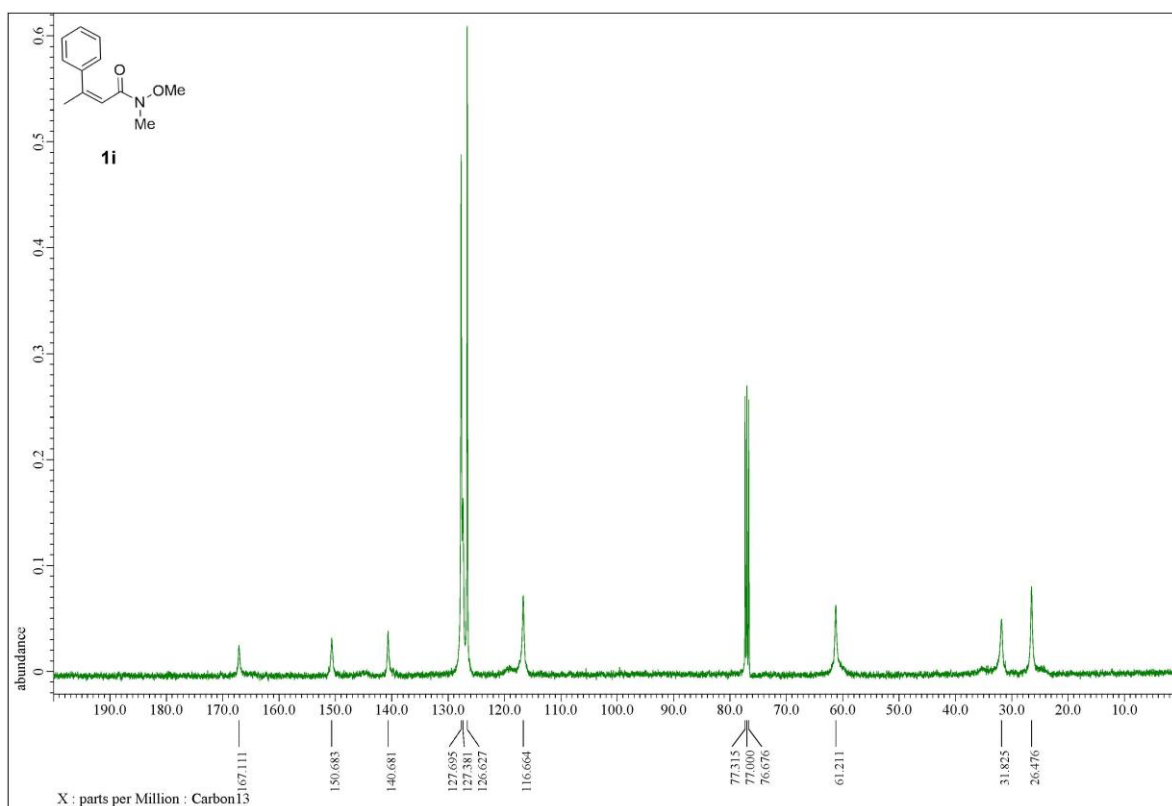

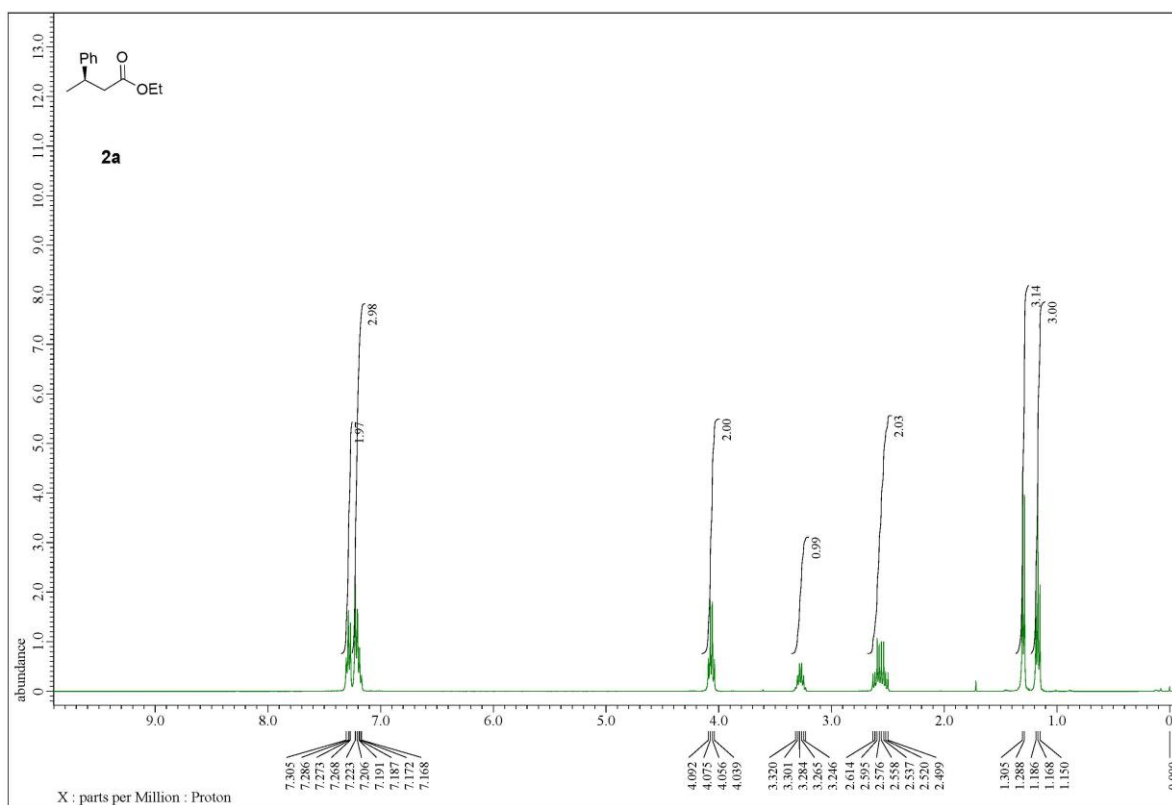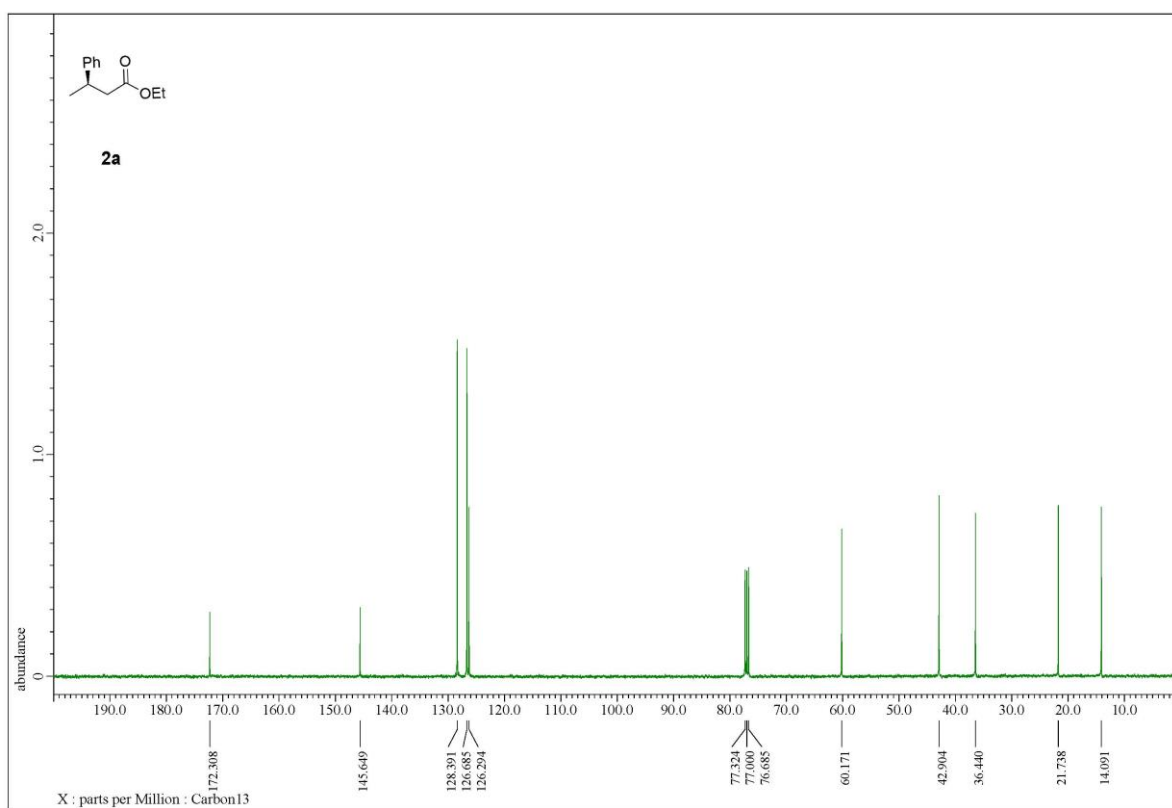

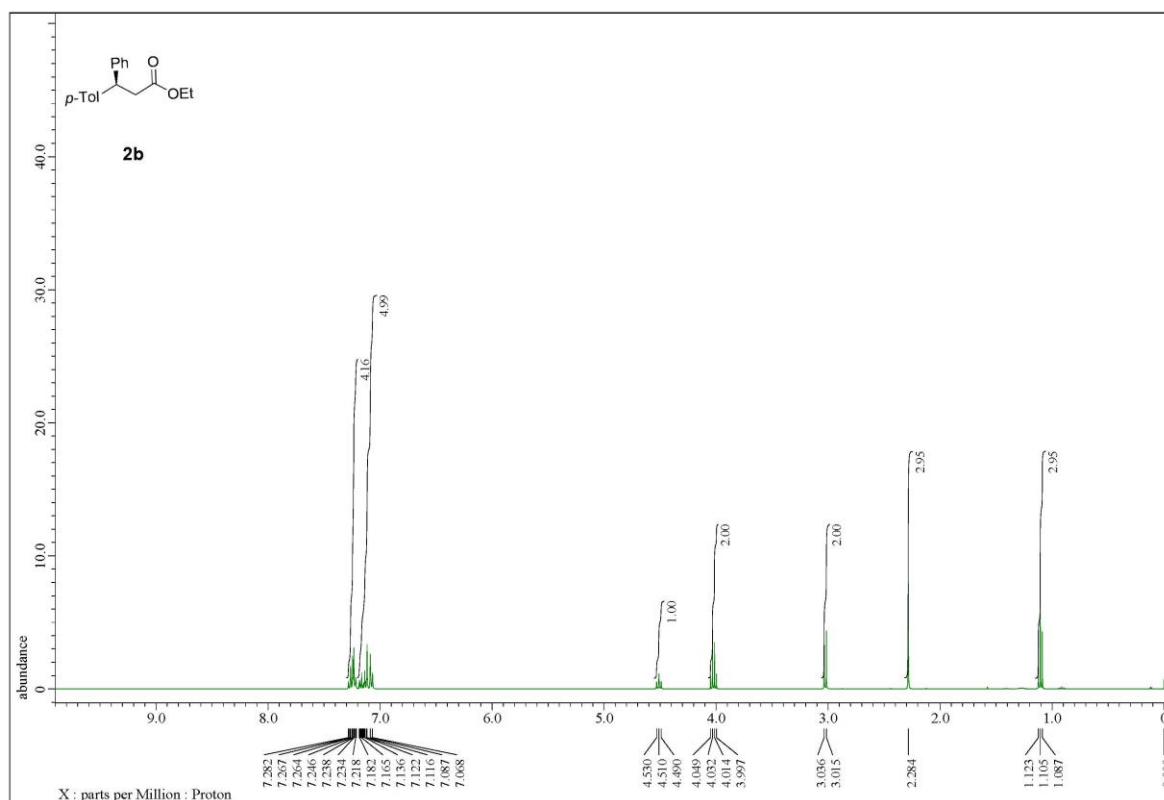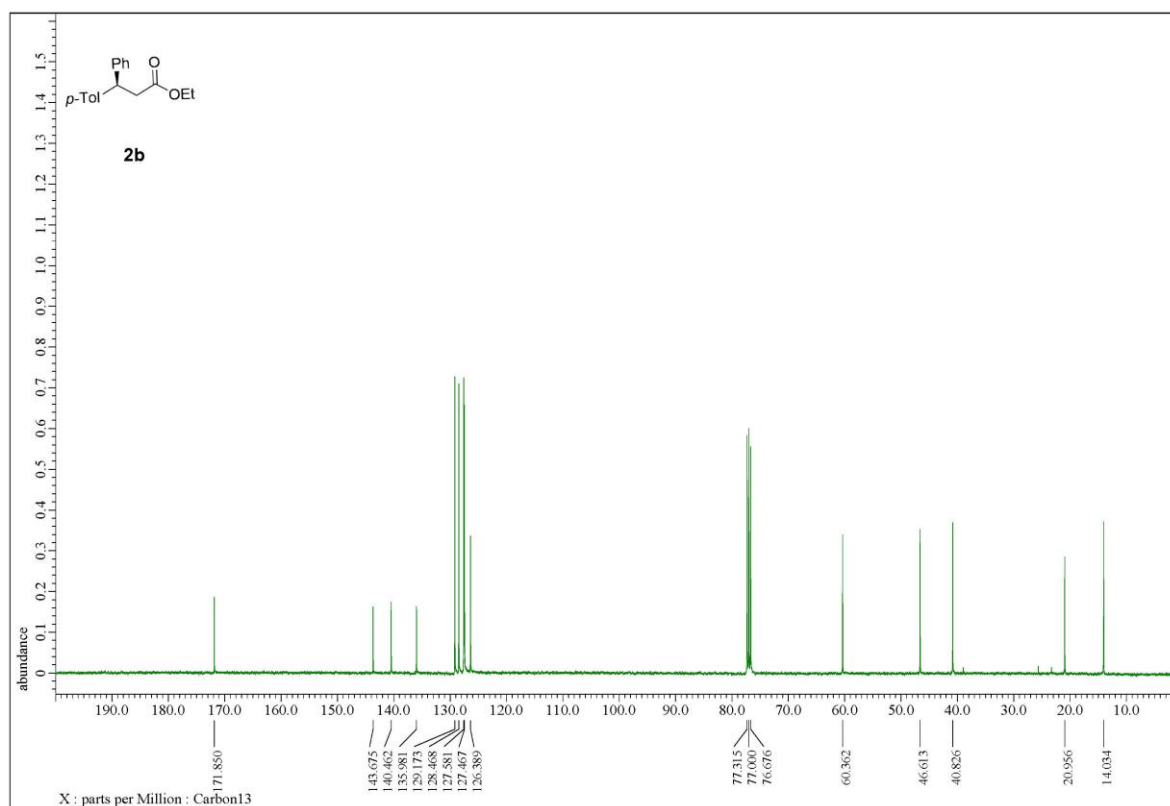

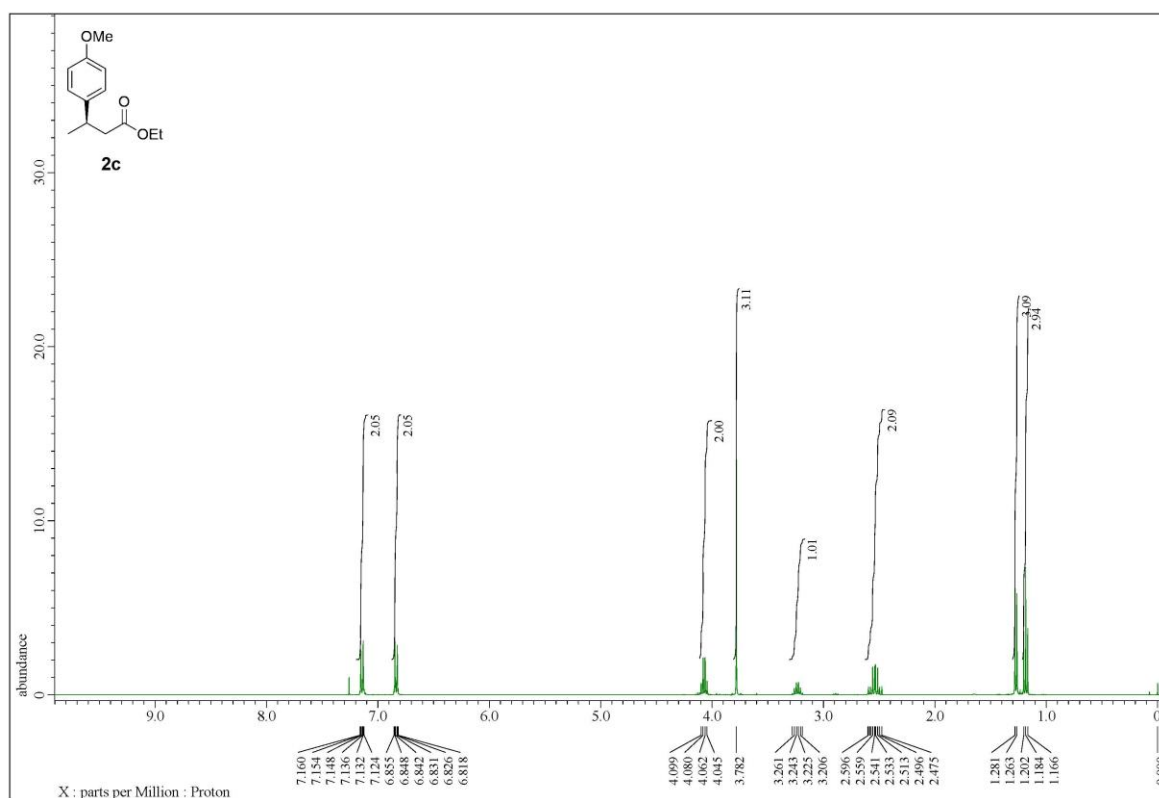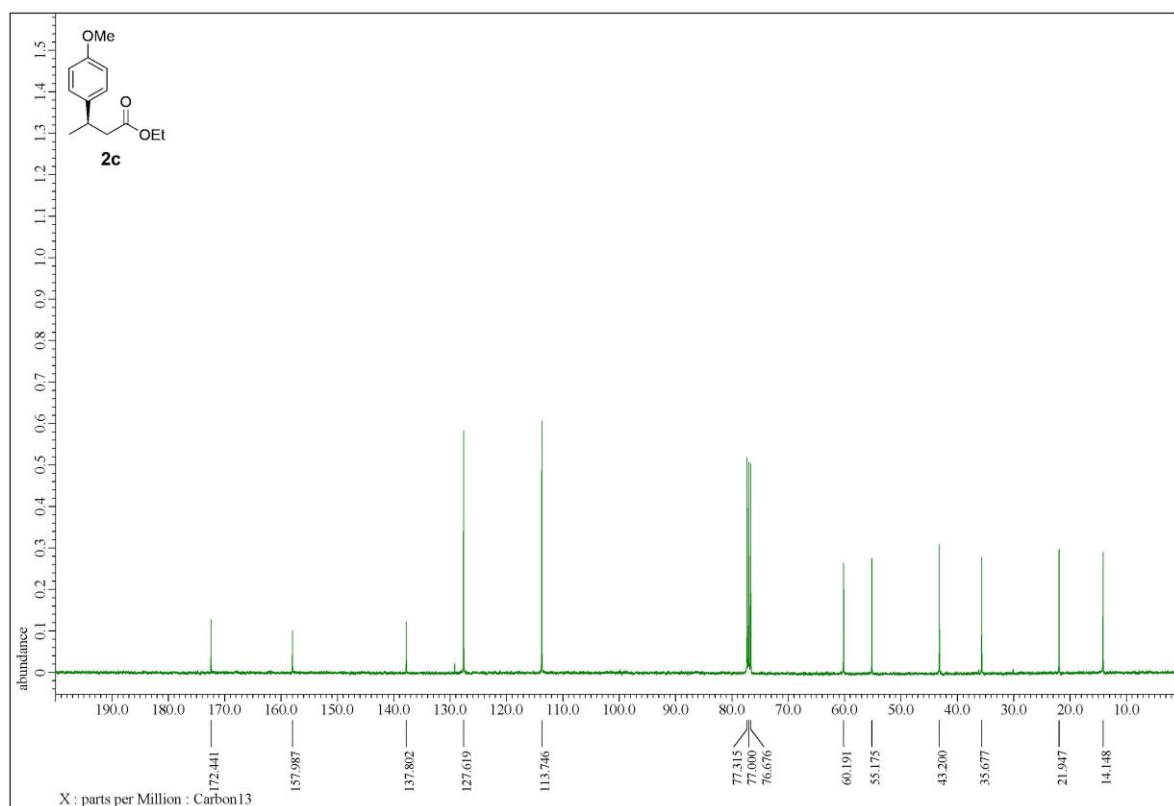



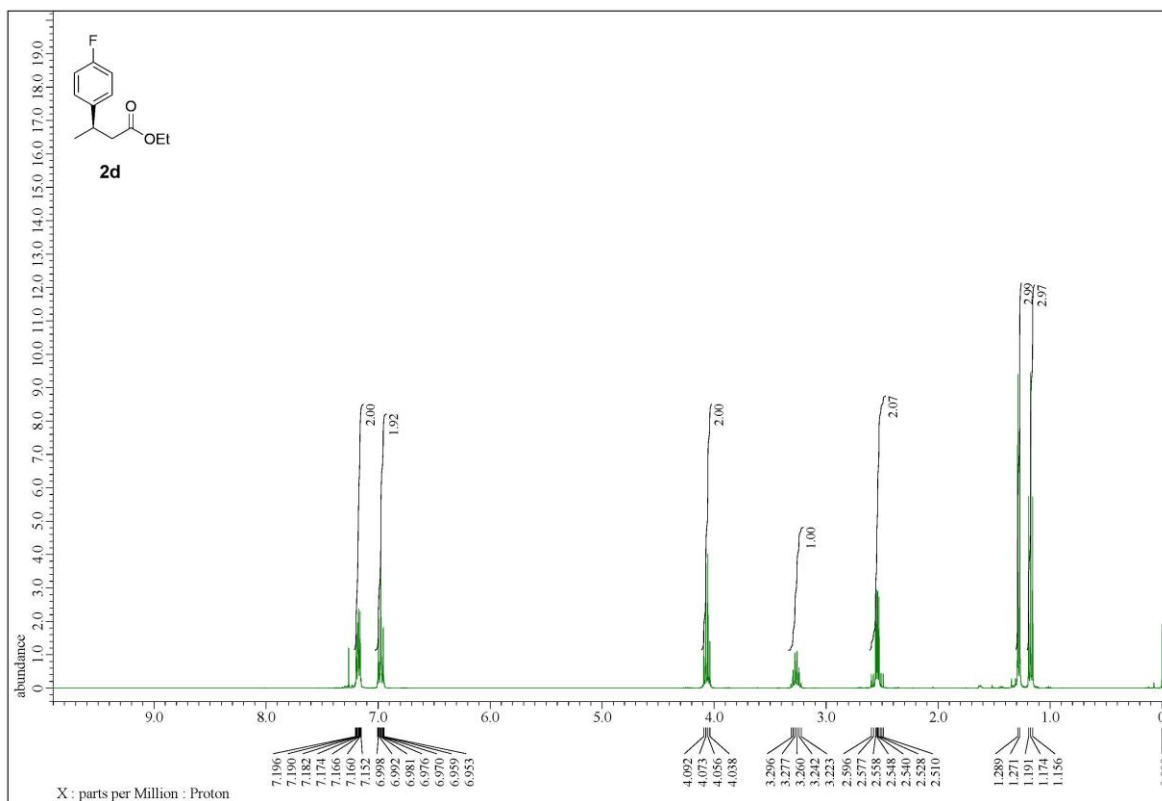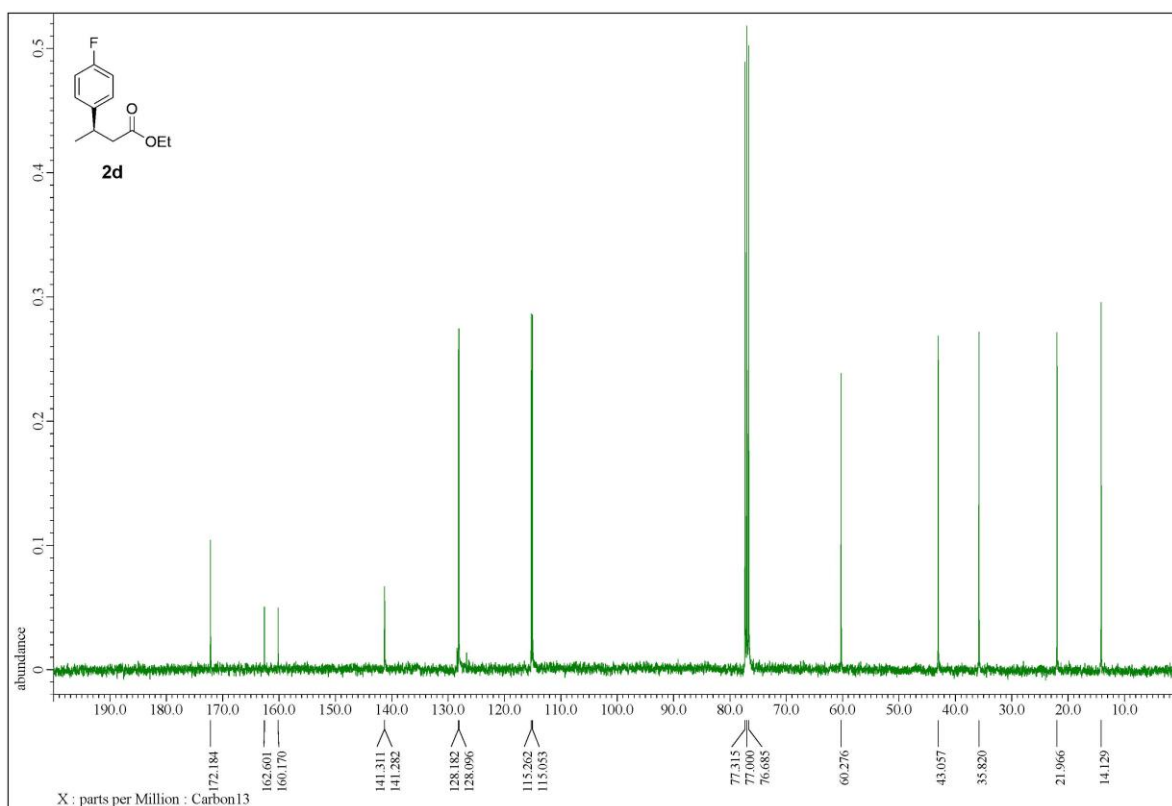

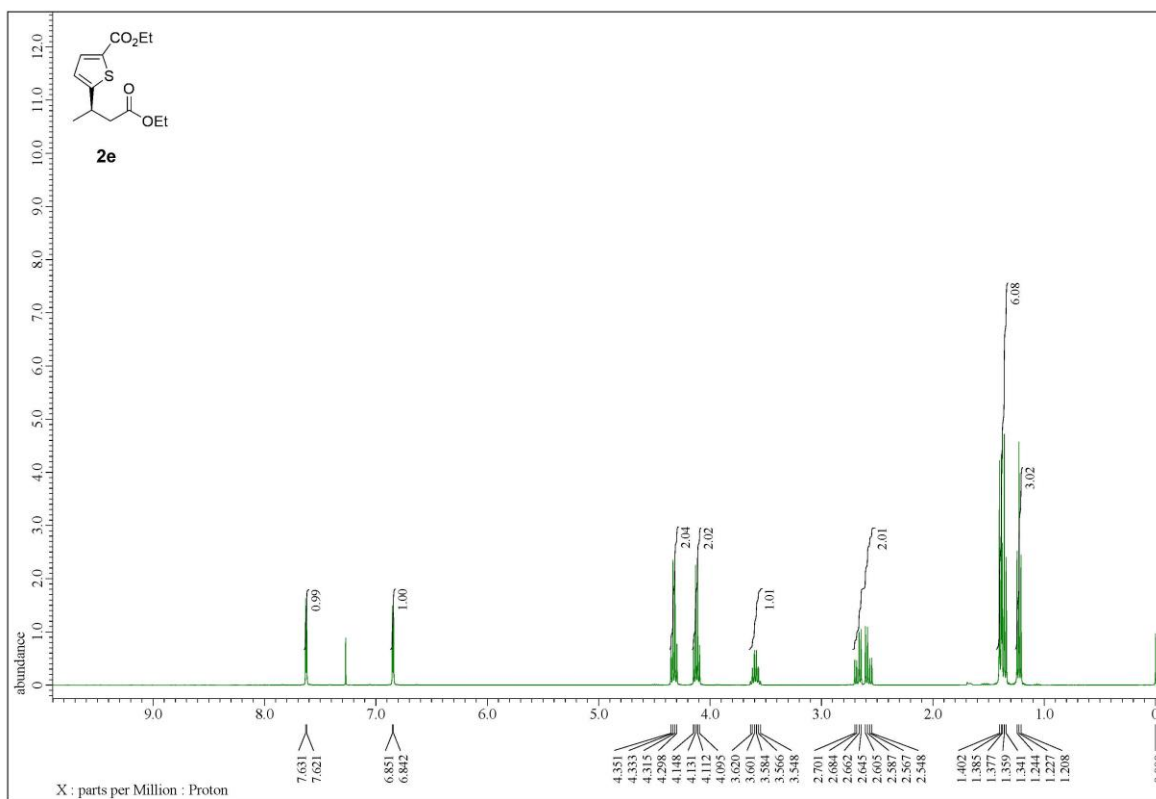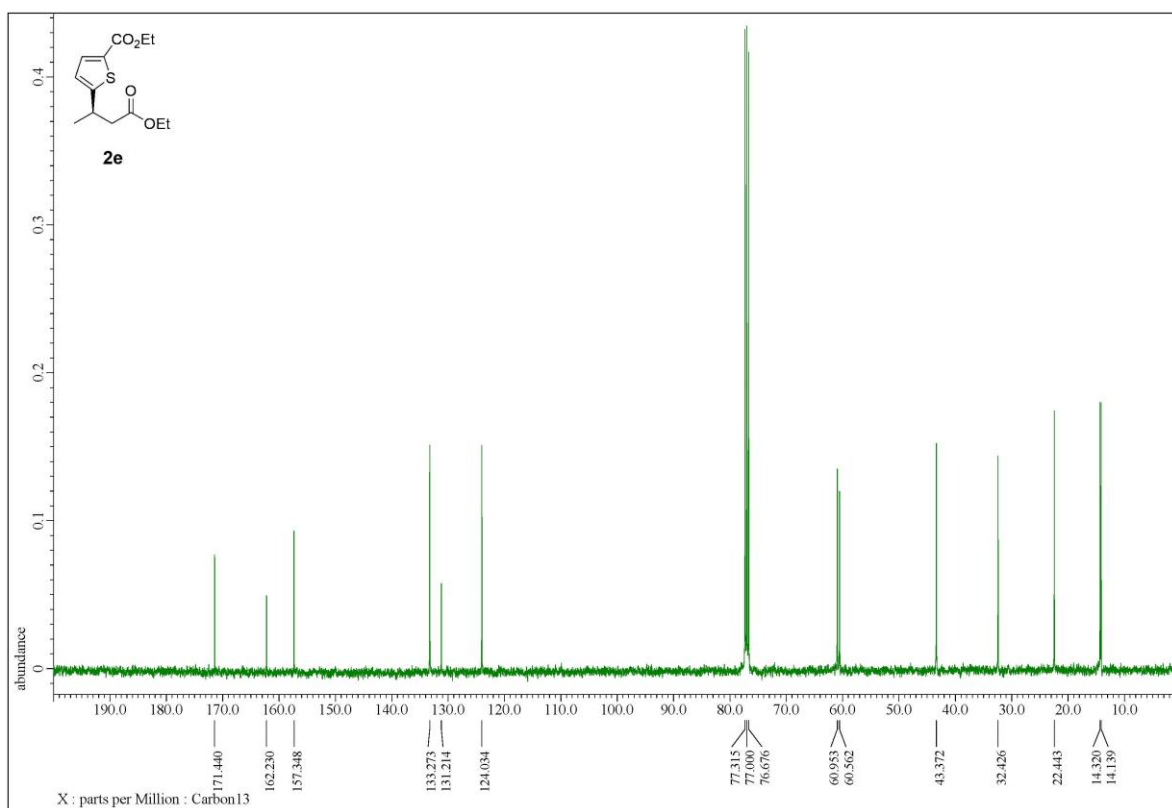

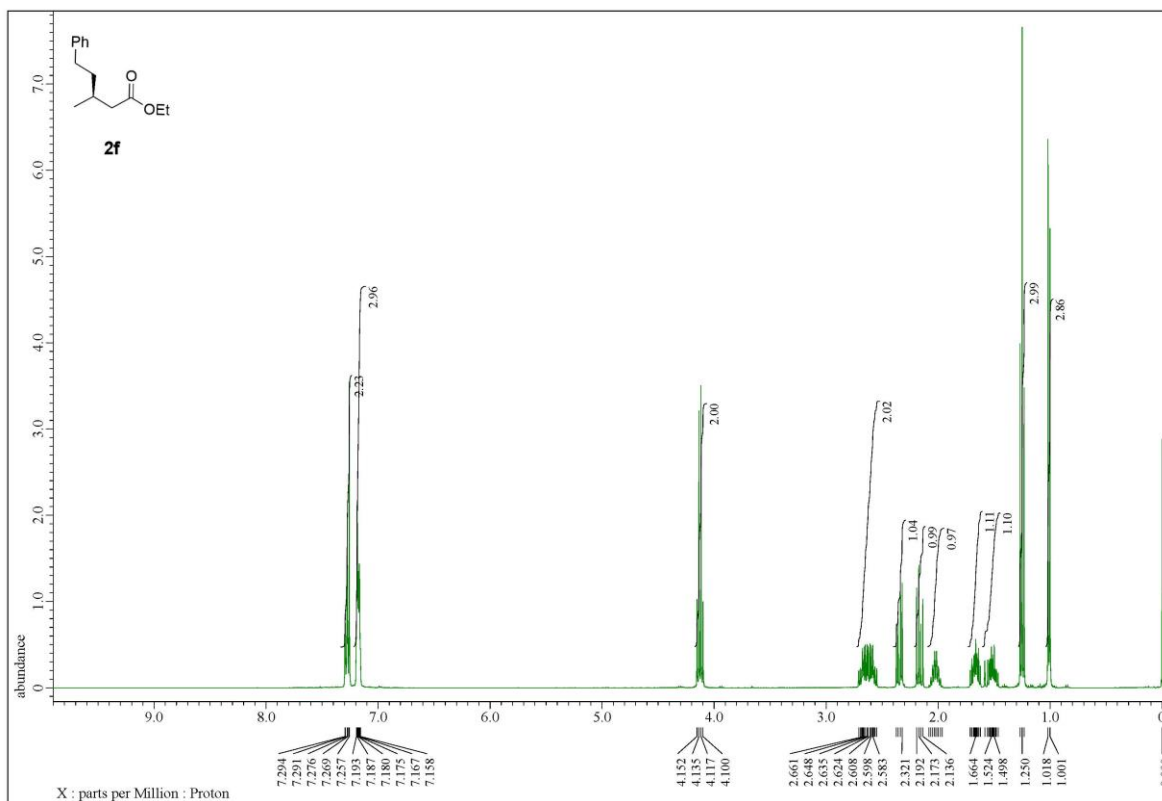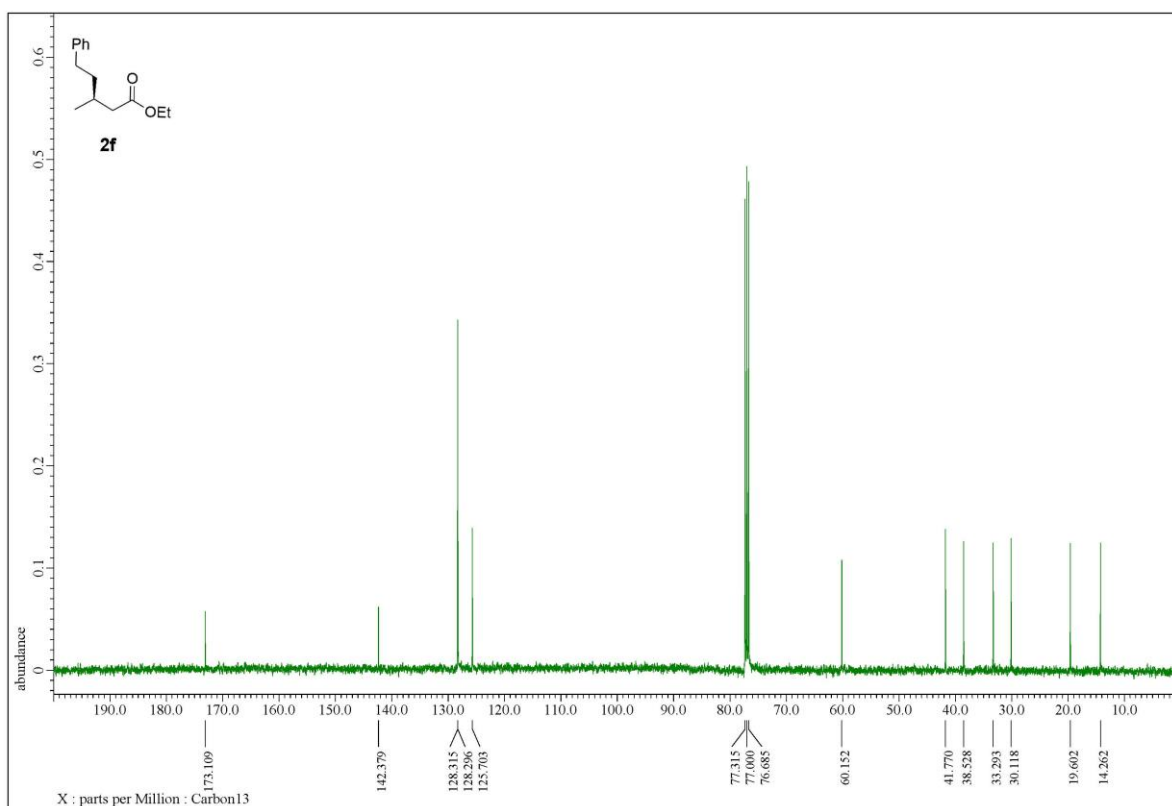

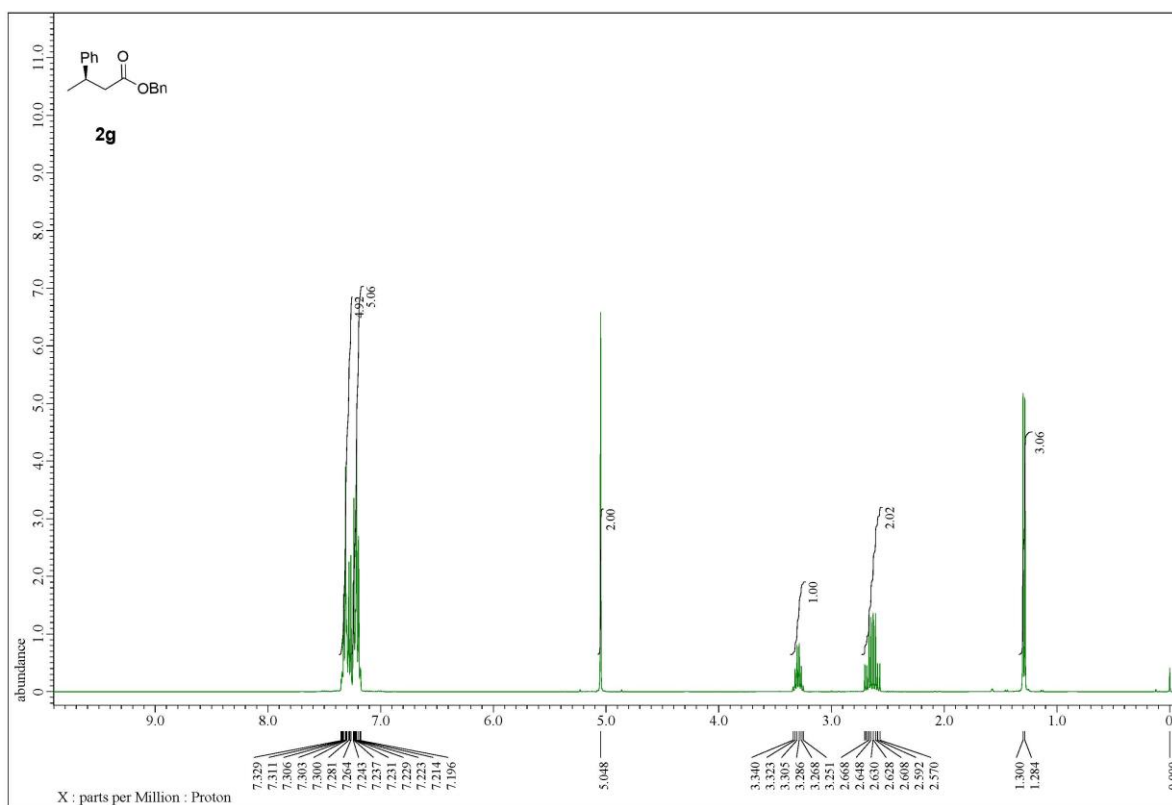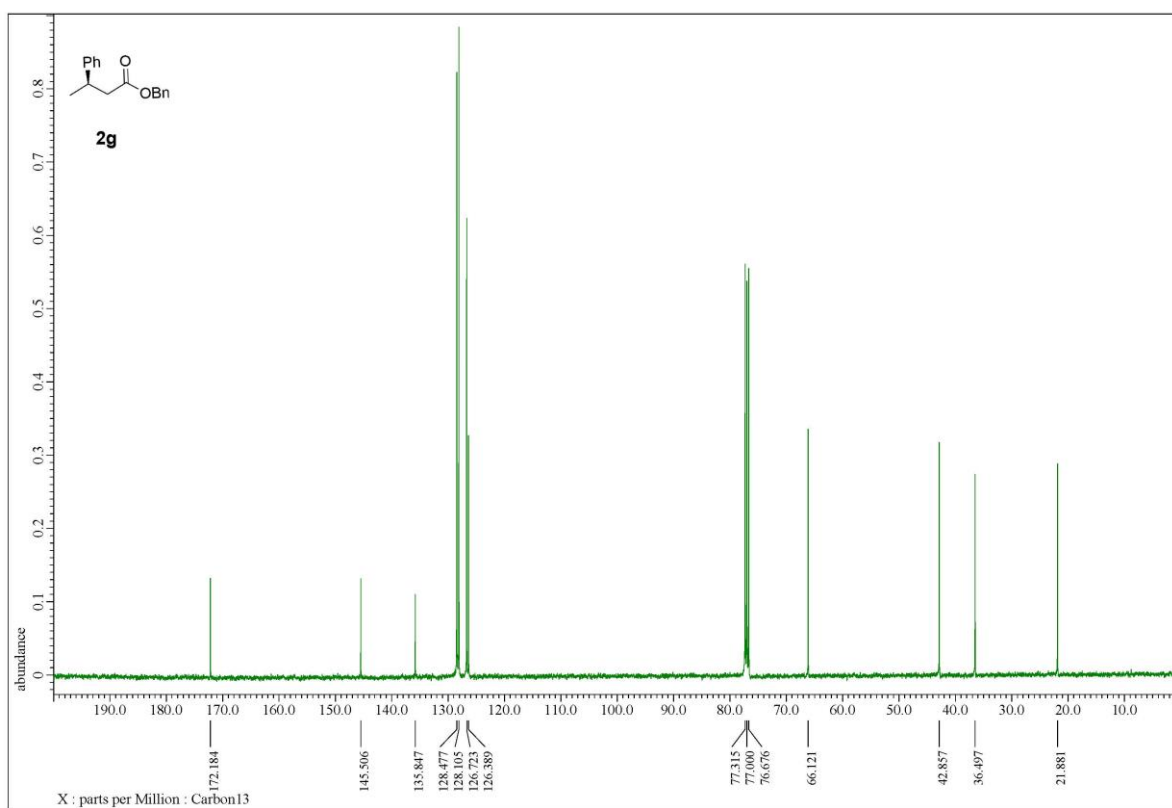

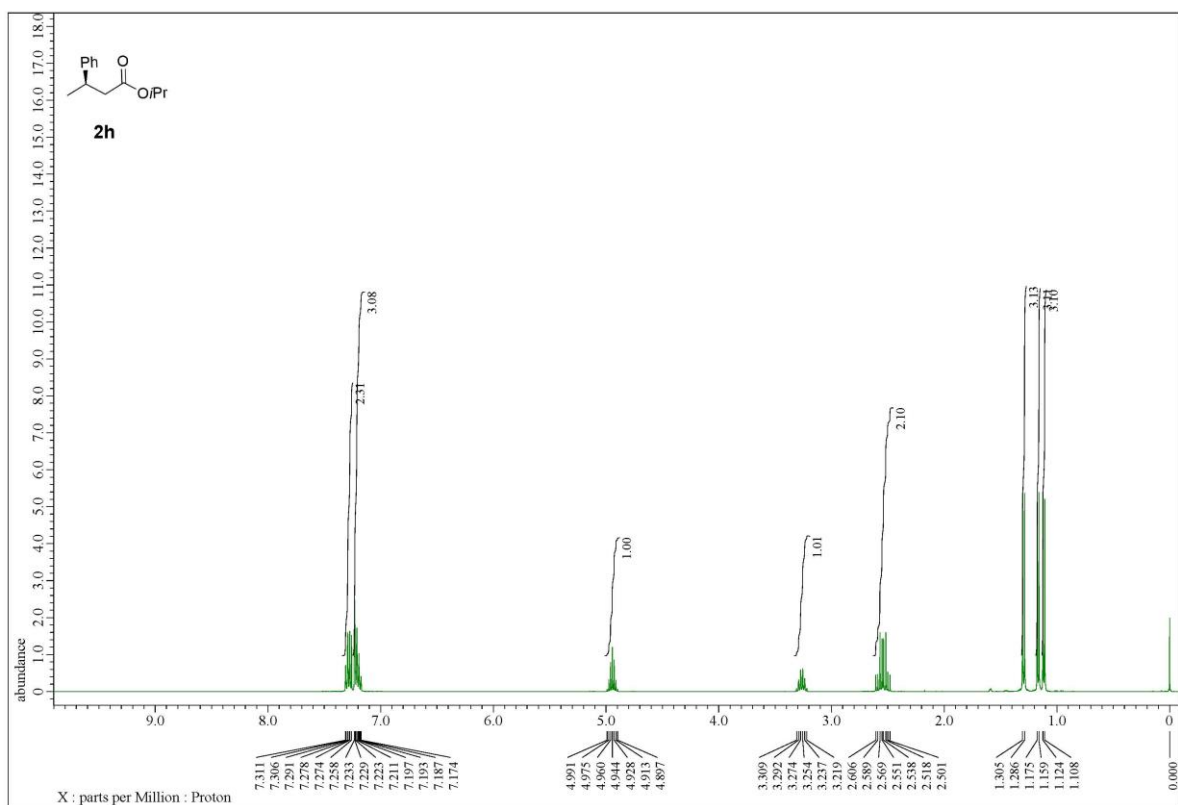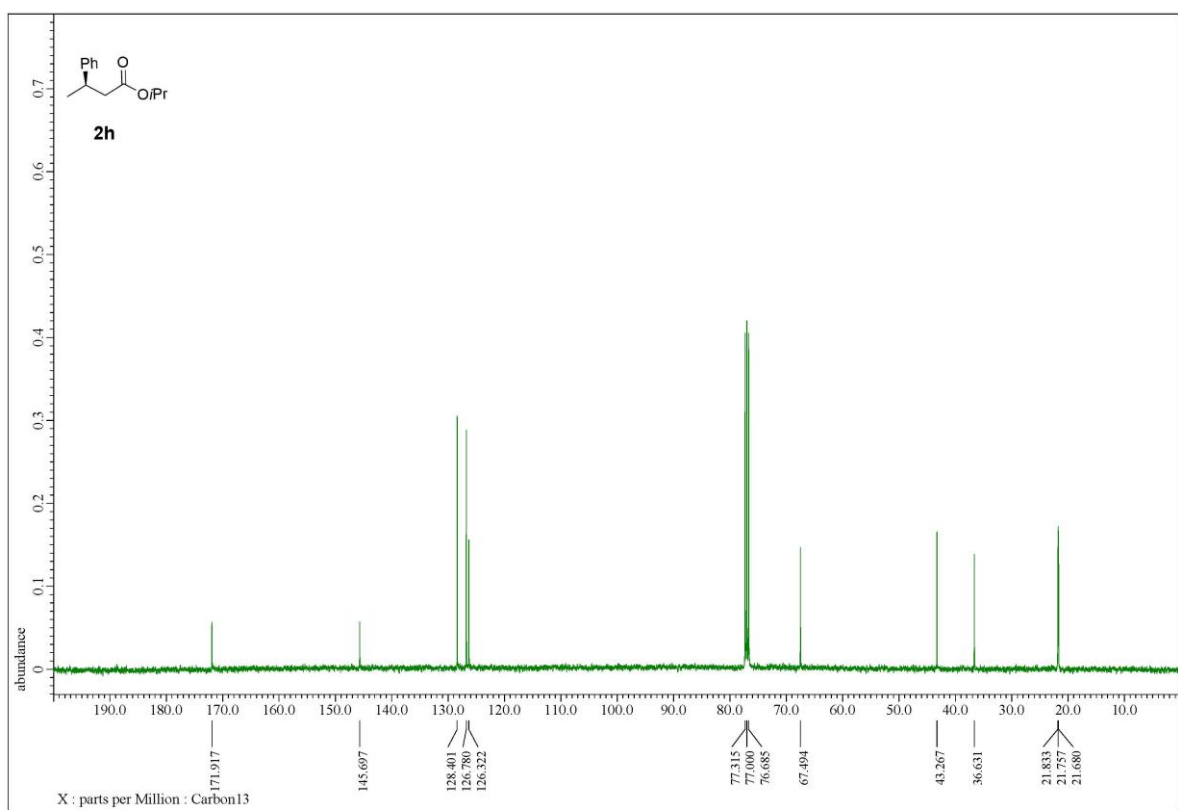

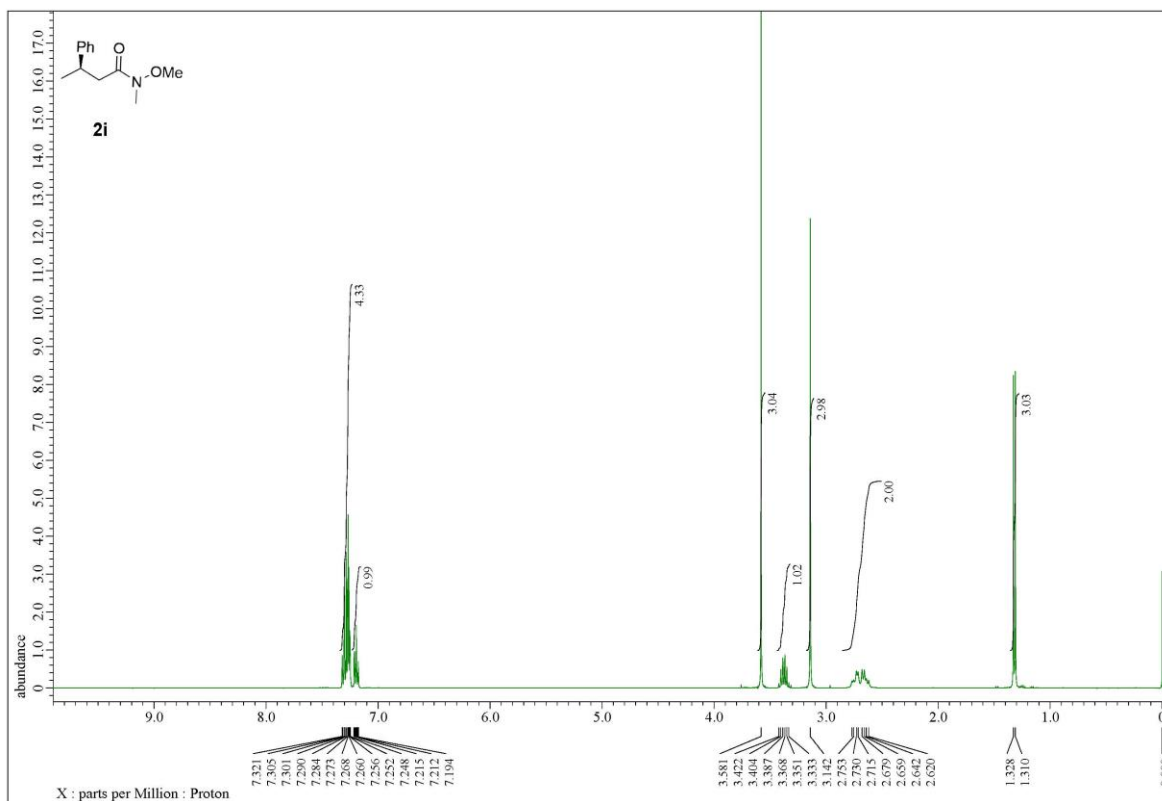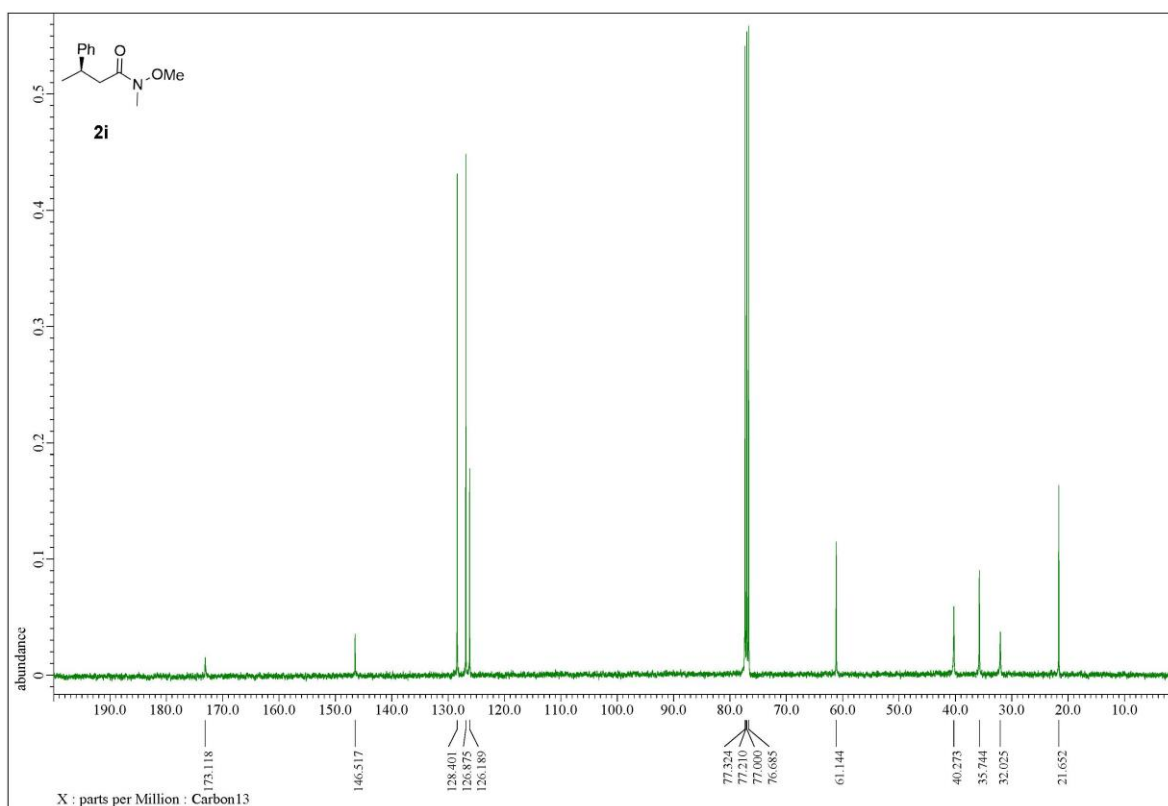

Supplement: Additional file 1 [file 1860-5397-16-50-S1.pdf]
